1

2

3 A Leak-Free Head-Out Plethysmography System to Accurately Assess Lung Function in Mice

4

5 Stephanie Bruggink<sup>1,2,†</sup>, Kyle Kentch<sup>1,†</sup>, Jason Kronenfeld<sup>1</sup>, and Benjamin J. Renquist<sup>1,2\*</sup>

6

7

8

9 **Affiliations:**

10 <sup>1</sup>Animal and Comparative Biomedical Sciences, University of Arizona, Tucson, AZ 85721

11 <sup>2</sup>Physiological Sciences GIDP, University of Arizona, Tucson, AZ 85724

12 †Co-First Authors

13 **Abbreviated Title:** Leak-Free Head-Out Plethysmography System

14 **Corresponding Author:** Benjamin Renquist

15 [bjrenquist@email.arizona.edu](mailto:bjrenquist@email.arizona.edu)

16 School of Animal and Comparative Biomedical Sciences

17 1117 E. Lowell St.

18 Tucson, AZ 85721

19

## Leak-Free Head-Out Plethysmography System

### 20 **Abstract**

21 Mice are a valuable model for elegant studies of complex, systems-dependent diseases, including  
22 pulmonary diseases. Current tools to assess lung function in mice are either terminal or lack  
23 accuracy. We set out to develop a low-cost, accurate, head-out variable-pressure plethysmography  
24 system to allow for repeated, non-terminal measurements of lung function in mice. Current head-  
25 out plethysmography systems are limited by air leaks that prevent accurate measures of volume  
26 and flow. We designed an inflatable cuff that encompasses the mouse's neck preventing air leak.  
27 We wrote corresponding software to collect and analyze the data, remove movement artifacts, and  
28 automatically calibrate each dataset. This software calculates inspiratory/expiratory volume,  
29 inspiratory/expiratory time, breaths per minute, enhanced pause, mid-expiratory flow, and end-  
30 inspiratory pause. To validate the use, we established our plethysmography system accurately  
31 measured tidal breathing, the bronchoconstrictive response to methacholine, sex and age  
32 associated changes in breathing, and breathing changes associated with house dust mite  
33 sensitization. Our estimates of volume, flow, and timing of breaths are in line with published  
34 estimates, we observed dose-dependent decreases in volume and flow in response to methacholine  
35 ( $P < 0.05$ ), increased lung volume and decreased breathing rate with aging ( $P < 0.05$ ), and that  
36 house dust mite sensitization decreased tidal volume and flow ( $P < 0.05$ ) while exacerbating the  
37 methacholine induced increases in inspiratory and expiratory time ( $P < 0.05$ ). We describe an  
38 accurate, sensitive, low-cost, head-out plethysmography system that allows for longitudinal  
39 studies of pulmonary disease in mice.

40

41

42

## Leak-Free Head-Out Plethysmography System

### 43 **New & Noteworthy**

44 We describe a variable-pressure head-out plethysmography system that can be used to assess lung  
45 function in mice. A balloon cuff that inflates around the mouse's neck prevents air leak, allowing  
46 for accurate measurements of lung volume and air flow. Custom software facilitates system  
47 calibration, removes movement artifacts, and eases data analysis. The system was validated by  
48 measuring tidal breathing, responses to methacholine, and changes associated with house dust mite  
49 sensitization, sex, and aging.

50

### 51 **Keywords**

52 Mice, head-out plethysmography, lung function, aging, bronchoconstriction

53

### 54 **Contributions to Study**

- 55 1. Stephanie Bruggink: development of head-out plethysmography chamber, measurement  
56 of breathing, data analysis, prepared manuscript
- 57 2. Kyle Kentch: development of head-out plethysmography chamber, programmed software  
58 to collect and analyze data, prepared manuscript
- 59 3. Jason Kronenfeld: development of tools to analyze data, analysis of data
- 60 4. Benjamin Renquist: development of head-out plethysmography chamber, statistical  
61 analysis, prepared manuscript

62

63

64

## Leak-Free Head-Out Plethysmography System

### 65 **Introduction**

66 Mice are a valuable experimental model to study complex, systems-dependent diseases.  
67 However, studies of the pulmonary system in mice are limited by the tools available to assess lung  
68 function. We set out to develop a low-cost, accurate, head-out variable-pressure plethysmography  
69 system to allow for repeated, sensitive, non-terminal measurements of lung function in mice.  
70 Common methods to assess lung function in mice include whole-body plethysmography, head-out  
71 plethysmography, and forced oscillation technique. However, these popular techniques have  
72 limitations.

73 With whole-body plethysmography the mouse is placed in a chamber large enough to allow  
74 for unrestricted movement, and changes in chamber pressure are measured. Changes in pressure  
75 or flow are used to assess lung volume and result from both alterations in air temperature and  
76 humidity as air enters/leaves the lung and alveolar gas compression and decompression (1-3).  
77 More than one-half of the change in chamber pressure or flow associated with breathing can be  
78 eliminated by equilibrating the humidity and temperature within the chamber with mouse's body  
79 temperature and the humidity of exhaled air (4). Thus, unless the chamber is set to mirror the  
80 mouse's body temperature and the humidity of exhaled air, the measured change in pressure or  
81 flow is partially an experimental artifact that cannot be quantified. This is a difficult challenge in  
82 a system that relies on continuous flow of air through the chamber (5). The remaining signal is a  
83 measure of alveolar compression and decompression of air, associated with flow and volume, two  
84 measures affected by airway resistance (4, 6).

85 Forced oscillation technique measures the impedance of gas waveforms directed into the lung  
86 of an anesthetized, paralyzed, tracheostomized, and ventilated mouse (7). This technique is  
87 sensitive, creating reproducible measures of airway mechanics. Different oscillation maneuvers

## Leak-Free Head-Out Plethysmography System

88 can be applied to determine resistance, compliance, elastance, input impedance, and the energy  
89 dissipated or conserved within the lung parenchyma (tissue damping/elastance). Resistance  
90 describes the patency of the conducting airway (resistance of the airway to airflow) and compliance  
91 describes the ability of lungs to expand (8, 9). This technique is precise, but, accuracy requires  
92 calibration, limiting resistance of the endotracheal cannula, proper positioning of the animal,  
93 standardization of lung volume history, and a passive respiratory system (10). Standardization is  
94 necessary because oscillations of different frequencies and volumes alter respiratory mechanics  
95 including resistance and compliance. Controlling the waveform oscillation with the same software  
96 program and technique for each measurement can resolve variability (2, 11-13). However, even  
97 when these technical challenges are overcome, this technique is limited. It is terminal, preventing  
98 repeated measures across time in the same mouse, and, it cannot be applied to understand  
99 alterations in the respiratory drive of breathing as mice are anesthetized and paralyzed (2).

100 Orotracheally intubating anesthetized mice is described as an alternative to forced oscillation  
101 technique because it allows for non-terminal measurements in spontaneously breathing animals  
102 (14). Flow is assessed from the orotracheal tube and transpulmonary pressure is assessed by  
103 measuring pressure changes from a water-filled esophageal tube (15). Still, this measurement must  
104 be performed in the anesthetized mouse. Since normal breathing patterns are altered with  
105 anesthesia, we aimed to identify a system that measured breathing in awake, conscious mice (16).

106 Head-out plethysmography assesses lung function by measuring flow or pressure changes  
107 inside a chamber caused by expansion and contraction of the ribcage as the animal inhales and  
108 exhales. Unlike whole-body plethysmography, in which the pressure change that results from  
109 ribcage expansion is negated by the concomitant removal of chamber air with inhalation, with  
110 head-out plethysmography the inhaled air is coming from outside the chamber. In turn, the

## Leak-Free Head-Out Plethysmography System

111 pressure change resulting from expansion of the ribcage is not negated by a simultaneous removal  
112 of air from the chamber (17). Unlike the forced oscillation technique, head-out plethysmography  
113 is non-terminal and performed in awake, conscious mice. In turn, head-out plethysmography  
114 allows for repeated measurements of physiologically relevant breathing. All published and  
115 commercial plethysmography chambers use a piece of latex (or other flexible plastic) to create an  
116 airtight seal around the mouse's neck (17). In preliminary studies we found this set-up did not  
117 create an airtight seal. Without an airtight seal, pressure-volume relationships to determine tidal  
118 volume and flow are inaccurate. Accordingly, as described, head-out plethysmography can provide  
119 accurate measures of the timing of breaths but cannot be applied to accurately assess either volume  
120 or flow.

121 Double-chamber plethysmography utilizes a similar set-up to head-out plethysmography with  
122 an additional chamber fit around the head or nose of the mouse. Pressure changes resulting from  
123 nasal flow and thoracic movements are measured separately (18). Importantly, this allows for  
124 measurement of specific airway resistance, assessed by the time delay between the nasal and  
125 thoracic flows. The change in lung volume proceeds the change in nasal flow, creating a pressure  
126 gradient to pull air into the lung. The delay between thoracic and nasal flows is short in healthy  
127 animals and increases with increased resistance. Although this dual chamber does have the added  
128 benefit of assessing resistance, accuracy is again limited by air leak between the head and body  
129 chambers (2, 14).

130 The lack of an accurate and sensitive tool to repeatedly measure breathing in the same mouse  
131 across time limits study design and mouse models that can be used to understand pulmonary  
132 disorders. We set out to create a leak-proof variable-pressure head-out plethysmography system  
133 that would allow for accurate and sensitive measurements of volume and flow. Because this system

## Leak-Free Head-Out Plethysmography System

134 records data corresponding to each breath, we created software to easily collect and manage the  
135 large amounts of data obtained from each mouse.

### 136 **Materials & Methods**

#### 137 *Head-Out Plethysmography Chamber*

138 The main body of the variable-pressure plethysmography double chamber is composed of  
139 two syringe barrels (inner chamber 60 ml Monoject #1186000555; outer chamber 300 ml A  
140 AKRAF #B07T7MN36N) with the hollow tip end removed from larger barrel (Figure 1.7). The  
141 larger syringe is cut shorter allowing the smaller syringe to extend beyond the larger syringe on  
142 both ends (Figure 1.7). The smaller syringe is held in place within the larger syringe using 3D-  
143 printed spacers at both ends (Figure 1I, 1.2). O-rings that fit tightly into grooves on the printed  
144 spacers create an airtight seal where the spacers meet the syringe walls (Figure 1F inner O-rings  
145 Danco #35736B 1.25 inch diameter x 1 inch diameter; Figure 1G outer O-rings Danco #35763B  
146 1.88 inch diameter x 1.62 inch diameter). The spacers must be fit onto the smaller syringe before  
147 removing the hollow tip of the inner syringe (Figure 1.2). A small amount of petroleum jelly may  
148 facilitate this. Next, the smaller syringe is perforated and hollow tip end removed (Figure 1.5).  
149 The perforations allow air to freely flow from the inner chamber to the outer chamber. To prevent  
150 air-leak, all perforations on the inner chamber must be between the two spacers. This double  
151 chamber system prevents the mouse from occluding the air input and pressure gauge attached to  
152 the outer syringe. The syringe plunger (Figure 1A) creates an air-tight seal at the back of the  
153 chamber. At the front of the inner chamber is an inflatable balloon cuff that allows the user to  
154 create an airtight seal around the mouse's neck. This balloon cuff is made from a 3D-printed ring  
155 (Figure 1J; 3-D Printer File at  
156 [https://github.com/bjrenquist/plethysmography/tree/main/printed\\_parts](https://github.com/bjrenquist/plethysmography/tree/main/printed_parts)) with the midline lined

## Leak-Free Head-Out Plethysmography System

157 with holes that allow air to pass from the outside to inside of the ring to inflate the balloon cuff.  
158 Both edges of the ring have grooves in which O-rings sit (Figure 1E Danco O-rings #35731B 0.94  
159 inch diameter x 0.75 inch diameter). To affix the balloon, a small latex balloon (Figure 1K Amscan  
160 #115914) is cut into a ~2 cm wide ring and put inside of the 3-D printed ring (Figure 1.3). The  
161 balloon ends are wrapped over the outside of the ring and held in place with O-rings (Figure 1.6).  
162 To allow inflation of the balloon, we use a needle (any size and brand) to perforate the balloon  
163 where the balloon ends overlap and occlude the holes along the midline of this ring (Figure 1.6).

164 We created a small air port (hole created with needle) in the inner syringe barrel to inflate  
165 the balloon cuff (Figure 1.2). Next, we placed the outer chamber over the inner chamber making  
166 sure not to move the 3D printed spacers, a process facilitated with a small amount of petroleum  
167 jelly. A female luer (Figure 1H thread style to 500 series barb 1/16 inch ID tubing Cole-Parmer  
168 Instrument #SK-45508-01 connected to tubing Picture 1B Silastic Laboratory Tubing #508-005)  
169 was briefly heated to melt the plastic and this melted luer was placed over the top of the hole and  
170 allowed to cool and adhere creating an air port onto which tubing could be attached. The tubing,  
171 cut to ~22 cm, is then connected to another female luer and a stopcock (Figure 1M Cole-Parmer  
172 #30600-00). This allows for the balloon cuff on the inside of the inner chamber to be inflated by a  
173 3 ml syringe from the stopcock.

174 A small hole (0.5 centimeter in diameter) in the outer chamber fits the barbed end of a dual  
175 barbed pressure transducer (Honeywell SSCSAAN004NDAA5 board mount pressure sensor SIP,  
176 dual ax barbed differential, 5 Volts), surrounded by a small segment of flexible tubing (Tygon #R-  
177 3603) to allow for an air-tight seal (Figure 1.4). The second barbed port of the pressure transducer  
178 is left open to atmospheric air. On the outer chamber another air port, created by placing a female  
179 luer over a small hole, is used for calibration (Figure 1H Biorad #7318223 connected to tubing



## Leak-Free Head-Out Plethysmography System

180 Picture 1C Tygon #R-3603). A stopcock (Figure 1M Masterflex #30600-02) is connected to the  
181 calibration tubing (cut to ~22 centimeters) via another female luer and air is injected with any 1  
182 ml syringe (Figure 1.7). A data acquisition unit (Measurement Computing, USB-1208FS-Plus)  
183 controlled by LabVIEW collects the voltage signal output from the pressure transducer. Multiple  
184 chambers and pressure transducers can be connected to the data acquisition unit to allow for the  
185 user to simultaneously measure breathing in multiple mice.

### 186 *Mouse Preparation and Loading into Chamber*

187 Prior to starting breathing measurements the mouse's neck is shaved and the remaining  
188 hair removed using a depilatory. This provides a smooth skin surface interfacing with the balloon  
189 cuff allowing for an airtight seal.

190 Mice are scruffed and gently placed headfirst in the plethysmography chamber. Once  
191 entirely in the chamber, the back is occluded with a syringe plunger and the mouse is coaxed  
192 toward the front of the chamber with the plunger. To prevent the mouse from biting and puncturing  
193 the balloon during loading, a small, flexible piece of plastic is set on the balloon and removed after  
194 the mouse has extended its head past the cuff and the plunger is far enough forward so the mouse  
195 cannot pull its head back into the chamber. Once the mouse has extended their head beyond the  
196 balloon cuff, a syringe, attached to the balloon air port, inflates the balloon restricting forward  
197 movement (Figure 1.8). To ensure an airtight seal, we use a 6 mL syringe filled with petroleum  
198 jelly to place petroleum jelly at the interface of the neck and balloon. Prior to each measurement  
199 we confirm the chamber is airtight by removing or adding air through the calibration port and  
200 verifying the induced change in pressure holds steady at this new baseline (Figure 1.9).

## Leak-Free Head-Out Plethysmography System

### 201 *Volume Calibration*

202           Since each mouse displaces different chamber volumes, the user must calibrate the volume-  
203 pressure relationship prior to each breathing measurement. We calibrate by rapidly injecting  
204 known volumes of air that range from 0.05-0.4 ml (0.05, 0.1, 0.2, 0.3, and 0.4 ml), as the inspiratory  
205 and expiratory volume is expected to be < 0.4 ml. We then quantify the pressure change associated  
206 with injection of a given volume. The chamber pressure is reset to atmospheric pressure by  
207 opening the 3-way stopcock, or simply removing the syringe from the stopcock, allowing room air  
208 to flow into the air port between each injection. To ensure precise calibration, each volume is  
209 injected 4 times. The software has a built-in annotation marker, allowing us to log the injection  
210 volume and timing (Figure 2A, C). Automated calibration software (use described below) allows  
211 the user to enumerate the pressure-volume relationship by regressing the change in pressure on  
212 volume injected and fitting an equation that will be used to extrapolate all changes in chamber  
213 pressure to changes in chamber volume associated with breathing (Figure 1.10).

### 214 *Breathing Measurements*

215           After calibration, breathing measurements are initiated. We waited at least 5 minutes for  
216 the mice to become accustomed to the chamber before collecting data, which was about the time  
217 it took to perform the calibration. When collecting only baseline measurements, we collected 10  
218 minutes of tidal breathing. In studies to understand the response to methacholine, we collected a  
219 5-minute baseline measurement followed by exposure to nebulized methacholine (MP  
220 Biomedicals, LLC). As multiple measurements were completed at different concentrations of  
221 methacholine, we averaged the 5-minute baseline measurements for each mouse to report tidal  
222 breathing. We exposed the mice to methacholine by placing the end of the nebulizer (Aeroneb  
223 lab nebulizer small unit, Kent Scientific) directly over the mouse's head to ensure delivery into the

## Leak-Free Head-Out Plethysmography System

224 airway. We delivered methacholine (dissolved in PBS) for 30 seconds at 0.191 ml/30 seconds at  
225 concentrations of 0, 25, 50, and 100 mg/ml of methacholine. Breathing was then measured for 10  
226 minutes after the conclusion of methacholine administration. When completed, the balloon cuff  
227 was deflated then the syringe plunger was removed allowing the mouse to back out of the chamber.  
228 Mice were allowed to fully recover after each dose of methacholine by allowing at least 1 hour  
229 between measurements. Time course data is presented as 1-minute rolling averages taken every 30  
230 seconds, while baseline data is presented as a 5-minute average. When applicable, we normalized  
231 to baseline values and present the data as change from baseline.

### 232 *House Dust Mite Sensitization*

233 After completion of the dose response study, lean mice were sensitized using house dust  
234 mite (HDM). HDM (100  $\mu$ g in 50  $\mu$ l sterile PBS; D. Pteronyssinus; Stallergenes Greer;  
235 #XPB82D3A2.5) was administered intranasally on days 0, 7, and 14 (19). 24-hours after the last  
236 HDM administration, assessment of tidal breathing and response to methacholine was completed  
237 as described above.

### 238 *Data Collection Using LabVIEW*

239 We developed a LabVIEW virtual instrument to facilitate the acquisition of real-time  
240 breathing measurements from up to two mice simultaneously. A set of driver software  
241 (Measurement Computing, ULx for NI labVIEW<sup>TM</sup>, Norton, MA; [https://www.mccdaq.com/daq-](https://www.mccdaq.com/daq-software/universal-library-extensions-lv.aspx)  
242 [software/universal-library-extensions-lv.aspx](https://www.mccdaq.com/daq-software/universal-library-extensions-lv.aspx)) was used to interface between LabVIEW and the  
243 data acquisition unit. This program samples the output voltage from each pressure transducer at a  
244 rate of 1000 Hz. The virtual instrument graphically displays the voltage signals in real-time for  
245 the user to visualize changes in pressure (Figure 2A). Titles and event timestamps allow the user

## Leak-Free Head-Out Plethysmography System

246 to record an identifier for the mouse being studied and the volume and timing of calibration  
247 injections.

248 The user interface for data collection is simple (Figure 2A). Upon opening the program,  
249 the identifier for the mouse and measurement identifier was entered into CH1 or CH2 Mouse ID  
250 and measurement initiated by selecting *Start CHI/CH2*. For calibration, the volume injected was  
251 written into CH1/CH2 Calibration Volume, the volume was injected, and *LOG* was selected.  
252 Selecting *LOG* marked that timepoint with the entered volume (shown in Figure 2C). Of note, this  
253 event marker cannot be visualized in real time and only numbers can be entered. The *Start/Stop*  
254 *CHI/2* was used to begin and end each measurement on each separate channel. CH1/2 Cuff  
255 indicates the pressure of a second pressure transducer attached to the balloon cuff air port line  
256 allowing us to ensure we inflate the balloon to similar pressures for each measurement.

### 257 *Data Analysis Using Python Graphical User Interface*

258 We developed a graphical user interface using Python 3.7 to convert the voltage signal,  
259 provided by the pressure transducer, into changes in chamber volume. Changes in chamber volume  
260 are representative of the mouse's tidal volume and allow for calculation of expiratory and  
261 inspiratory volume, expiratory and inspiratory time, breaths per minute, enhanced pause (Penh),  
262 mid-expiratory flow (EF50), and end-inspiratory pause (Figure 2B).

263 The voltage signal from the pressure transducer is converted to a pressure signal based on  
264 the transducer's specifications (Honeywell SSCSAAN004NDAA5) and its transfer function by

265 *Equation 1:*

$$266 \quad E_{output} = (0.80 \times E_{supply} / (P_{max} - P_{min}) \times (P_{applied} - P_{min}) + 0.10 \times E_{supply} \quad (\mathbf{Eq.1})$$

267 where  $E_{output}$  is the output voltage signal,  $E_{supply}$  is the voltage supplied to the pressure transducer,

## Leak-Free Head-Out Plethysmography System

268  $P_{max}$  and  $P_{min}$  are the maximum and minimum of the transducer's pressure range, respectively, and  
269  $P_{applied}$  is the differential pressure between the measurement and reference ports of the transducer.

270 Calibration injections are used to empirically transform the pressure signal into a chamber  
271 volume signal. Air injected into the chamber creates a stable deflection in the pressure signaling  
272 which can be used to create a pressure-volume relationship (Figure 1.9, 1.10). To filter out the  
273 breathing signal and isolate the calibration injection signal, the pressure signal is smoothed using  
274 a Gaussian filter with a sigma of 400 datapoints (Figure 2C). For each calibration injection, a  
275 region of interest is initially bounded by the 24 seconds before and 12 seconds after the injection  
276 timepoint. Each region of interest is then refined by examining the local signal variance within two  
277 breathing periods (400 ms) of each datapoint. The final region of interest consists of a continuous  
278 segment of datapoints surrounding the injection timepoint where the local signal variance is no  
279 less than half the median value. This final region of interest is down sampled to improve processing  
280 speed, retaining 1 in every 4 datapoints.

281 To the smoothed pressure signal, we then applied a moving step fit algorithm in each region  
282 of interest (20). The published method was modified to optimize volume-pressure correlation and  
283 use the most datapoints to develop this correlation. To account for differences in signal-to-noise  
284 ratio, the half-window size,  $w$ , varies with calibration injection volume,  $v$ , such that  $w = 200 / v$ .  
285 Instead of a first-degree polynomial, we use a zero-degree polynomial for the fitting functions,  
286 under the assumption that the slope before and after a calibration step is zero. After obtaining  $\theta_i$   
287 (the indicator for the probability of datapoint,  $i$ , to be a potential step position) a step height  
288 threshold is selected at 0.25 standard deviations from  $\theta_i = 0$ . Datapoints outside this threshold  
289 represent step regions and datapoints within the threshold represent plateau regions (Figure 2C).  
290 To be used in the analysis, a region of interest must consist of an initial baseline plateau followed

## Leak-Free Head-Out Plethysmography System

291 by an upward step to a calibration plateau containing the calibration injection timepoint.  
292 Furthermore, each plateau must exceed a step width threshold of 0.5 seconds. The change in  
293 pressure for a calibration injection is calculated as the difference between the mean unsmoothed  
294 pressure signal values of the calibration and baseline plateaus.

295 The pressure changes of the calibration injections were matched with known injection  
296 volumes and a linear regression was used to determine the relationship between pressure and  
297 volume (Figure 1.10). Where  $V_{injection}$  is the injection volume, and  $m$  is the slope. Given that there  
298 is no change in pressure without a change in volume, we set the  $\Delta P$ -intercept (y-intercept) to 0.

$$299 \quad \Delta P = m \times V_{injection} \quad (\mathbf{Eq. 2})$$

300 To ensure accuracy of the calibration, all injection volumes were repeated in quadruplicate  
301 and any points with a residual value exceeding one standard deviation away from the mean residual  
302 value were excluded.

303 A calibration injection causes an equivalent decrease in chamber volume ( $V_{injection} = -$   
304  $\Delta V_{chamber}$ ). Injection volume is substituted by change in chamber volume to calculate the mouse's  
305 respiration signal:

$$306 \quad \Delta P = m \times -\Delta V_{chamber} \quad (\mathbf{Eq. 3})$$

307 For our analyses, we report change in plethysmography chamber volume as a proxy for changes  
308 lung volume.

309 We used a Gaussian filter (sigma of 5 datapoints) to reduce noise present in the volume  
310 signal. This signal was then detrended to correct for any global drift in chamber pressure by fitting  
311 a line to the entire signal and subtracting this line from the signal. Further local drift correction  
312 was performed by subtracting the result of a two-second sliding average window from the global  
313 corrected volume signal. This correction for global and local drift helped to eliminate broad

## Leak-Free Head-Out Plethysmography System

314 deflections in the breathing signals that were caused by small changes in chamber volume from  
315 the mouse repositioning.

316 To determine airway flow (volume change/time) we first fitted the smoothed and drift-  
317 corrected volume signal with a cubic spline. Flow was obtained from the first-order time derivative  
318 (change in volume/change in time) of the cubic spline function.

319 We adapted the peak detection algorithm previously described by Noto *et. al* for locating  
320 the inspiratory peak and expiratory trough of each breath in humans (21). We adjusted the window  
321 sizes used by this algorithm from 300, 500, 700, 1000, and 5000 msec used in humans to 10, 20,  
322 50, 100, and 200 msec for our mouse data to account for the faster breathing rate observed in mice  
323 compared to humans. The window shift sizes remained unchanged at 0%, 33%, and 66% of  
324 window size. Additionally, we included a smoothing step consisting of a Gaussian smoothing filter  
325 with a large sigma of 30 prior to the detection of consensus peaks and troughs. This reduced the  
326 detection of false-positive peaks and troughs caused by minor fluctuations in pressure.

327 To determine the presence of pauses in breathing between inspiratory and expiratory  
328 phases (end-inspiratory pause) we again adopted a previously described algorithm (21). Since we  
329 were primarily interested in pauses occurring between the inhale and exhale phases, and not those  
330 occurring midway through one of these phases, we limited the search for pauses to those that  
331 occurred within the first 25% of volume increase (expiration). For each breath, the airway flow  
332 signal between the breath's peak and trough was used to identify the end of inhalation, the pause  
333 after inhalation, and the onset of exhalation.

334 Pauses were determined by creating a histogram of flow values from the peak to trough,  
335 where the range of flow values is equally split into 50 bins. We first identified the bin containing  
336 the zero-flow value. Then we examined the five bins on either side of the zeroth bin. Of these 11

## Leak-Free Head-Out Plethysmography System

337 bins, the bin with the highest count was identified as the center of the pause, or mode bin. A pause  
338 was detected if the mode bin count was at least two times larger than the mean count across all  
339 bins. Additional bins next to the mode bin were included as part of the pause if their count was at  
340 least 0.75 times that of the mode bin. In the case where no pause was detected, the end of exhalation  
341 and onset of inhalation were defined by the zero-crossing of the flow signal. When a pause was  
342 present, the end of inhalation and start of the post-inhale pause were defined as the point where  
343 the maximum flow value among pause bins was exceeded. Likewise, the end of the post-inhalation  
344 pause and start of exhalation were defined as the point where the minimum flow value among  
345 pause bins was exceeded.

346       Once the start and end of each phase of breathing were determined, the software identified  
347 the remaining important breathing landmarks and used those to calculate the variables that describe  
348 each breath (Table 1).

349       Because mouse movement significantly alters the pressure signal, we had the software  
350 eliminate any measurements that were distorted using pre-defined, quality control algorithms. Any  
351 breaths where the original voltage signal exceeded minimum or maximum voltage saturation  
352 thresholds (0.150 and 4.800 Volts, respectively) were excluded. To determine if a breath coincided  
353 with mouse movement, the 50% inhale and exhale volume landmarks of each breath were  
354 compared to a movement threshold of 0.4 ml. For an ideal breath, both points should coincide with  
355 the global mean volume value. If the volume at either of these points was greater than 0.4 ml away  
356 from the global mean, the breath was excluded. Next, the inhale/exhale volumes, inhale/exhale  
357 peak flows, and inhale/exhale durations for each breath were compared to the mean values of these  
358 statistics for all other breaths within a 30-second window centered on that breath's onset of  
359 inhalation. If any of these values were more than four standard deviations from the mean, the



## Leak-Free Head-Out Plethysmography System

360 breath was excluded. A final control based on proximity to other excluded breaths was  
361 implemented, since measurement artifacts tended to span breathing segments that included  
362 multiple breaths. A breath was excluded based on proximity if it was located between two excluded  
363 breaths, and if it was less than four breaths away from each of these excluded breaths.

### 364 *Utilizing Software Programs for Analysis and Calibration*

365 Differences in animal size alters free chamber volume and the relationship between change  
366 in volume and change in pressure. In turn, the chamber is calibrated each time an animal is placed  
367 in the chamber. The calibration curve was highly repeatable within and between mice with a  
368 within subject coefficient of variation of  $5.38 \pm 1.96\%$  and between subject coefficient of variation  
369 of  $5.55 \pm 1.01\%$  (Supplementary Table 1). Sensitivity limitations were assessed by identifying the  
370 residual difference between the known injected volume and calculated volume based on the  
371 regression curve. The average residual was  $12.39 \pm 0.134 \mu\text{l}$  resulting in a 95% confidence interval  
372 for sensitivity of 10.79 to 13.99  $\mu\text{l}$  (Supplementary Table 1). In turn, 10.79  $\mu\text{l}$  is the minimum  
373 change in breathing we can measure with confidence. Importantly, because this calculation was  
374 based on residuals from a known and calculated volume and our known volume (as measured  
375 using a 1 ml syringe) likely had error greater than 10  $\mu\text{l}$ , this is likely an underestimate of our  
376 sensitivity using this system.

377 The software for calibration and analysis are a single program  
378 (<https://github.com/bjrenquist/plethysmography>; Figure 2B). We stopped the recording after  
379 calibration and restarted recording for the measurement meaning the calibration files saved  
380 separately from files we analyzed. For calibration files, the user opens the respiratory analysis  
381 program and opens the file with the calibration injections (clicking *File* → *Open* → *Select File*).  
382 When opened the user can see the voltage and pressure traces. To calibrate, the user goes to

## Leak-Free Head-Out Plethysmography System

383 automatic calibration (*Analysis*→*Start Automatic Calibration*) and for calibration files selects *No*  
384 on the pop-up screen. Next, we visually examined the linear regression equation calculated by the  
385 program for a low number of points identified or a low  $R^2$  value. Before saving the calibration  
386 file, the time for the program to find breath landmarks (*Analysis*→*Find Breath Landmarks*) must  
387 be entered. The calibration file is then saved (*File*→*Save As*).

388         Once the corresponding calibration file was analyzed, the user opened the file to be  
389 analyzed. This time the user again selects automatic calibration (*Analysis*→*Start Automatic*  
390 *Calibration*) and selects *Yes* to use the calibration data from the calibration Microsoft Excel file  
391 previously saved. To complete the analysis, the user enters the time frame for the program to find  
392 breath landmarks and saves the output file in the appropriate folder. The output files can be opened  
393 in Excel for further analysis.

### 394 *Statistics*

395         Mixed model analysis of variance was performed in SAS (SAS Inst., Cary, NC) for all  
396 analyses. To assess the dose response to methacholine we identified the maximal change from  
397 baseline in each mouse at each dose. Methacholine dose response was analyzed using a repeated  
398 measures ANOVA with dose as the main effect. Differences between means at each dose were  
399 corrected for multiple comparisons using a Tukey's adjustment. The effect of HDM on tidal  
400 breathing was assessed using a repeated measures ANOVA with HDM exposure (pre- or post) as  
401 the main effect. The effect of HDM on the methacholine dose response was analyzed with a  
402 repeated measures ANOVA that included dose and HDM exposure as the main effects. Differences  
403 between means were investigated within a methacholine dose using Bonferroni correction for  
404 multiple comparisons. The effect of age (6 or 18 mo.) and sex (male or female) on tidal breathing

## Leak-Free Head-Out Plethysmography System

405 was assessed using a two-way ANOVA. Differences between means were corrected for multiple  
406 comparisons using a Tukey's adjustment.

### 407 **Results**

#### 408 *Chamber validation*

409 To validate our system, we measured tidal breathing in lean adult male mice. We report  
410 inspiratory and expiratory volume, the time of inspiration and expiration, breaths per minute,  
411 enhanced pause (Penh), mid-expiratory flow (EF50), and end-inspiratory pause (also referred to  
412 as duration of braking) (17, 21). Inspiratory time, expiratory time, breaths per minute, Penh, and  
413 end-inspiratory pause measured by our system were all within published ranges (Supplementary  
414 Table 2).

415 We applied our head-out plethysmography system to measure breathing changes caused  
416 by acute bronchoconstriction induced by aerosolized methacholine (30 seconds of exposure) in  
417 sterile PBS (0, 25, 50 and 100 mg/ml at a nebulization rate of 0.191 ml/30 seconds). In line with  
418 previous reports, we found that methacholine dose-dependently decreased inspiratory/expiratory  
419 volume, EF50, and breaths per minute and increased inspiratory time, expiratory time, and Penh  
420 (Figure 3, Supplementary Table 3) (18, 26-30). Methacholine also increased end-inspiratory  
421 pause, a variable less commonly reported, but easily observable after methacholine administration  
422 (Figure 3O, P, Supplementary Figure 1 red in volume trace).

423 We further validated the use of our system to measure alterations in lung function  
424 associated with HDM sensitization. HDM sensitization tended to decrease inspiratory volume ( $P$   
425 = 0.067; Figure 4A) and Penh ( $P$  = 0.058; Figure 4F) and decreased expiratory volume ( $P$  = 0.016;  
426 Figure 4B), breaths per minute ( $P$  = 0.0093; Figure 4E), and EF50 ( $P$  = 0.015; Figure 4G). HDM  
427 sensitization also increased end-inspiratory pause ( $P$  = 0.0029; Figure 4H) and end-inspiratory

## Leak-Free Head-Out Plethysmography System

428 pause and expiratory time ( $P = 0.014$ ; Figure 4I). HDM sensitization increased the methacholine  
429 (100 mg/ml dose exposure for 30 seconds; ~19.1 mg delivered total) induced increase in  
430 inspiratory time ( $P = 0.0156$ ; Figure 5C) and end-inspiratory pause ( $P = 0.0508$ ; Figure 5H) and  
431 tended to increase the methacholine extension of expiratory time ( $P = 0.0648$ ; Figure 5B).

432 We further validated the use of our system to measure tidal breathing changes associated  
433 with sex and aging. Inspiratory (Male  $P = 0.0002$ ; Female  $P = 0.0016$ ; Figure 6A) and expiratory  
434 (Male  $P = 0.0026$ ; Female  $P = 0.0102$ ; Figure 6B) volume, inspiratory time (Male  $P = 0.0071$ ;  
435 Female  $P = 0.0007$ ; Figure 6C), and Penh (Male  $P < 0.0001$ ; Female  $P = 0.0565$ ; Figure 6F)  
436 increased with age in both male and female mice. Mid-expiratory flow increased with age in  
437 male mice ( $P = 0.0003$ ; Figure 6G) and tended to increase with age in female mice ( $P = 0.11$ ;  
438 Figure 6G). End-inspiratory pause ( $P = 0.016$ ; Figure 6H) and end-inspiratory pause and  
439 expiratory time ( $P = 0.0176$ ; Figure 6I) increased with age only in female mice. Breaths per minute  
440 decreased with age in both male and female mice (Male  $P = 0.0137$ ; Female  $P = 0.0015$ ; Figure  
441 6E).

## 442 Discussion

443 By incorporating an inflatable balloon cuff that secures around the mouse's neck, we  
444 created a leak free variable-pressure head-out plethysmography system that allows for accurate,  
445 repeatable measurements of volume and flow. Although inspiratory and expiratory volume are  
446 not direct measures of tidal volume, they are direct measures of the change in volume in the  
447 chamber resulting from expansion and contraction of the ribcage. Since air expands when warmed  
448 and humidified in the lungs, these measured values are larger than direct measures of tidal volume  
449 (Supplementary Table 2) (22).

## Leak-Free Head-Out Plethysmography System

450 HDM is commonly used to create a mouse model of asthma similar to the disease in  
451 humans (22, 23). Sensitization increases airway responsiveness, inflammation, and induces airway  
452 remodeling (24-26). We measured alterations in tidal breathing, including decreases in volume  
453 and EF50, consistent with reports of tidal breathing in humans with asthma and HDM sensitized  
454 mice (27-30). Individuals with asthma have increased respiratory rate, inspiratory flow rate, and  
455 decreased minute ventilation, tidal volume, and inspiratory time (27-29). Airway hyper-  
456 responsiveness to methacholine is characteristic of asthma (31). HDM sensitization in mice  
457 increases the responsiveness to methacholine, with greater decreases in EF50, increases in Penh,  
458 and increases in airway resistance and elastance (18, 32-34). Herein, we measure HDM  
459 sensitization increases methacholine induced changes in inspiratory and expiratory time and the  
460 end-inspiratory pause indicative of the expected increased airway-hyperresponsiveness in a HDM  
461 sensitized mouse.

462 The variable most reported from whole-body plethysmography measurements is Penh, a  
463 dimensionless variable designed to describe the waveform of each breath (3, 33). Penh is mouse  
464 strain specific and may not correlate with more sensitive measures of lung function, such as those  
465 measured using forced oscillation technique (1, 27, 34). Though we did measure an increase in  
466 Penh following administration of a bronchoconstrictor (Figure 3K, L), we recognize that Penh may  
467 not correlate with the gold-standard invasive measurements of resistance, tissue damping, and  
468 airway elastance (35).

469 This head-out plethysmography system does not measure resistance, compliance,  
470 conductance, or elastance which are direct, sensitive measures of lung mechanics that serve as the  
471 gold standard for rodent lung function. With minor modifications this system could be adjusted  
472 to become a double-chamber plethysmography system allowing for the measurement of specific

## Leak-Free Head-Out Plethysmography System

473 airway resistance and specific airway conductance. Our design incorporating a leak-proof body  
474 chamber would eliminate the potential for air leak between the nasal and thoracic chamber.

475 Previous studies using forced oscillation technique report that methacholine increases  
476 airway resistance, airway elastance, tissue damping, and tissue elastance and decreases  
477 conductance and compliance (23-25). We report methacholine induced changes in breaths per  
478 minute, EF50, expiratory time, and volume, all variables which are associated with increases in  
479 airway resistance, and changes in conductance and dynamic compliance (14, 21, 27-29). We have  
480 further shown that inspiratory/expiratory volume, breaths per minute, EF50, and end-inspiratory  
481 pause are sensitive to aging, corresponding to age-related alterations in resistance and compliance  
482 (31, 32).

483 With this system, animals can recover from previous exposure to a bronchoconstrictor, or  
484 other treatment, before receiving the next dose. We have shown that many variables assessed with  
485 head-out plethysmography (expiratory/inspiratory volume, inspiratory time, breaths per minute,  
486 and end-inspiratory pause) do not return to baseline within 10 minutes after exposure to a low dose  
487 of methacholine (25 mg/ml exposure for 30 seconds; total of ~4.775 mg methacholine) (Figure  
488 3A, C, E, I, O). Without recovery bronchoconstriction from a previous dose may limit subsequent  
489 delivery of methacholine attenuating the effect of incremental increases in methacholine dose (35,  
490 36). Delivery of methacholine is not limited in studies applying forced oscillation technique, as  
491 deep inflation, inflating the lungs to total lung capacity, is performed after each methacholine dose  
492 (35). However, the reported response to methacholine using whole-body plethysmography uses  
493 an incremental protocol without allowing for sufficient time for mice to recover (37-39). Finally,  
494 utilizing our head-out plethysmography system, we can observe the time course of response to an  
495 acute intervention rather than being limited to reporting a maximal response (Figure 3) (33, 39-

## Leak-Free Head-Out Plethysmography System

496 42) . Many investigations only present a brief period of normal breathing (e.g. 10 breaths or 45  
497 seconds) and methacholine response as the maximum or minimum response (10, 18, 35, 39, 41,  
498 43). We designed our software to automatically calculate rolling averages over a long timeframe  
499 to ensure a more accurate time-dependent model.

500 We report greater amounts of bronchoconstriction (both percent change and  
501 minimum/maximum percent change) at lower methacholine doses than previously reported in  
502 studies using whole-body plethysmography (gray Supplementary Table 3). Importantly, to avoid  
503 potential confounding effects of prior bronchoconstriction, we only compared our results to the  
504 first dose given in previous studies (white Supplementary Table 3). In addition, although we use  
505 C56BL/6 mice, which have a diminished response to methacholine, we report greater changes in  
506 volume, inspiratory time, breaths per minute, Penh, and EF50 at lower doses of methacholine  
507 (Supplementary Table 3) (35, 44). Our enhanced response may be due to improved drug delivery,  
508 better software capturing data for each breath, and/or enhanced system sensitivity. We aerosolized  
509 methacholine directly onto the face of the mouse instead of into a whole-body plethysmography  
510 chamber. In addition, we utilized a nebulizer that produces small particle size (4.0-6.0  $\mu\text{m}$ ) which  
511 are more easily delivered further into the lung. Finally, our airtight chamber allows for accurate  
512 determination of changes in volume and flow.

513 Forced oscillation technique, the gold standard, cannot be used to assess the respiratory  
514 drive of breathing, which can only be measured in an awake, conscious mouse. Control of  
515 respiration is altered in asthma, chronic obstructive pulmonary disorder, morbid obesity, or  
516 neuromuscular diseases (45-48). The respiratory drive of breathing is also altered in mouse models  
517 of disease, such as asthma or obesity, and under hypoxic and hypercapnic conditions which can be  
518 assessed by measuring the volume and the timing of each breath (33, 49, 50).

## Leak-Free Head-Out Plethysmography System

519           We developed and validated a variable-pressure head-out plethysmography system that can  
520 accurately assess breath volume and timing across a large timeframe, with multiple replicates in  
521 the same mouse. We created corresponding software to collect and analyze large datasets. This  
522 provides an attractive alternative to forced oscillation technique, whole-body plethysmography,  
523 and commercially available head-out plethysmography systems to study pulmonary function and  
524 disease in mice.



## Leak-Free Head-Out Plethysmography System

### 525 **Acknowledgements**

526 We want to acknowledge the researchers that helped with analysis of the data: Skylar Knight,  
527 Kendra Miller, and Emily Ngu. Finally, we would also like to thank Dr. Janko Nikolich- Žugich  
528 and Jennifer Uhrlaub for the use of mice from their colony.

### 529 **Grants**

530 ABRC ADHS14-082986

531 ABRC ADHS17-00002043

532 T32 HL 007249

### 533 **Disclosures**

534 No conflicts of interest, financial or otherwise, are declared by the authors.

535

References

536

- 537 1. **Berndt A, Leme AS, Williams LK, Von Smith R, Savage HS, Stearns TM, Tsaih S-**  
538 **W, Shapiro SD, Peters LL, Paigen B, and Svenson KL.** Comparison of unrestrained  
539 plethysmography and forced oscillation for identifying genetic variability of airway  
540 responsiveness in inbred mice. *Physiological genomics* 43: 1-11, 2011.
- 541 2. **Bates JH, and Irvin CG.** Measuring lung function in mice: the phenotyping uncertainty  
542 principle. *J Appl Physiol (1985)* 94: 1297-1306, 2003.
- 543 3. **Hamelmann E, Schwarze J, Takeda K, Oshiba A, Larsen GL, Irvin CG, and**  
544 **Gelfand EW.** Noninvasive measurement of airway responsiveness in allergic mice using  
545 barometric plethysmography. *Am J Respir Crit Care Med* 156: 766-775, 1997.
- 546 4. **Lundblad LK, Irvin CG, Adler A, and Bates JH.** A reevaluation of the validity of  
547 unrestrained plethysmography in mice. *J Appl Physiol (1985)* 93: 1198-1207, 2002.
- 548 5. **Enhorning G, van Schaik S, Lundgren C, and Vargas I.** Whole-body  
549 plethysmography, does it measure tidal volume of small animals? *Can J Physiol Pharmacol* 76:  
550 945-951, 1998.
- 551 6. **Rubini A, Carniel EL, Parmagnani A, and Natali AN.** Flow and volume dependence  
552 of rat airway resistance during constant flow inflation and deflation. *Lung* 189: 511-518, 2011.
- 553 7. **Schuessler TF, and Bates JH.** A computer-controlled research ventilator for small  
554 animals: design and evaluation. *IEEE Trans Biomed Eng* 42: 860-866, 1995.
- 555 8. **Shiner RJ, and Steier J.** *Lung Function Tests Made Easy E-Book.* Elsevier Health  
556 Sciences, 2012.
- 557 9. **Desai JP, and Moustarah F.** Pulmonary Compliance. In: *StatPearls.* Treasure Island  
558 (FL): 2021.
- 559 10. **McGovern TK, Robichaud A, Fereydoonzad L, Schuessler TF, and Martin JG.**  
560 Evaluation of respiratory system mechanics in mice using the forced oscillation technique. *J Vis*  
561 *Exp* e50172, 2013.
- 562 11. **Hirai T, McKeown KA, Gomes RF, and Bates JH.** Effects of lung volume on lung and  
563 chest wall mechanics in rats. *J Appl Physiol (1985)* 86: 16-21, 1999.
- 564 12. **Robichaud A, Fereydoonzad L, and Schuessler TF.** Delivered dose estimate to  
565 standardize airway hyperresponsiveness assessment in mice. *Am J Physiol Lung Cell Mol*  
566 *Physiol* 308: L837-846, 2015.
- 567 13. **Robichaud A, Fereydoonzad L, Urovitch IB, and Brunet JD.** Comparative study of  
568 three flexiVent system configurations using mechanical test loads. *Exp Lung Res* 41: 84-92,  
569 2015.
- 570 14. **Hoymann HG.** Lung function measurements in rodents in safety pharmacology studies.  
571 *Front Pharmacol* 3: 156-156, 2012.
- 572 15. **Brown RH, Walters DM, Greenberg RS, and Mitzner W.** A method of endotracheal  
573 intubation and pulmonary functional assessment for repeated studies in mice. *J Appl Physiol*  
574 *(1985)* 87: 2362-2365, 1999.
- 575 16. **Massey CA, and Richerson GB.** Isoflurane, ketamine-xylazine, and urethane markedly  
576 alter breathing even at subtherapeutic doses. *J Neurophysiol* 118: 2389-2401, 2017.
- 577 17. **Glaab T, Taube C, Braun A, and Mitzner W.** Invasive and noninvasive methods for  
578 studying pulmonary function in mice. *Respir Res* 8: 63, 2007.

- 579 18. **Mailhot-Larouche S, Deschênes L, Lortie K, Gazzola M, Marsolais D, Brunet D,**  
580 **Robichaud A, and Bossé Y.** Assessment of Respiratory Function in Conscious Mice by Double-  
581 chamber Plethysmography. *J Vis Exp* 2018.
- 582 19. **Addison KJ, Morse J, Robichaud A, Daines MO, and Ledford JG.** A Novel in vivo  
583 System to Test Bronchodilators. *J Infect Pulm Dis* 3: 10.16966/12470-13176.16120, 2017.
- 584 20. **Opfer J, and Gottschalk K-E.** Identifying discrete states of a biological system using a  
585 novel step detection algorithm. *PloS one* 7: e45896-e45896, 2012.
- 586 21. **Noto T, Zhou G, Schuele S, Templer J, and Zelano C.** Automated analysis of  
587 breathing waveforms using BreathMetrics: a respiratory signal processing toolbox. *Chem Senses*  
588 43: 583-597, 2018.
- 589 22. **Cates EC, Fattouh R, Wattie J, Inman MD, Goncharova S, Coyle AJ, Gutierrez-**  
590 **Ramos JC, and Jordana M.** Intranasal exposure of mice to house dust mite elicits allergic  
591 airway inflammation via a GM-CSF-mediated mechanism. *J Immunol* 173: 6384-6392, 2004.
- 592 23. **Johnson JR, Wiley RE, Fattouh R, Swirski FK, Gajewska BU, Coyle AJ, Gutierrez-**  
593 **Ramos JC, Ellis R, Inman MD, and Jordana M.** Continuous exposure to house dust mite  
594 elicits chronic airway inflammation and structural remodeling. *Am J Respir Crit Care Med* 169:  
595 378-385, 2004.
- 596 24. **van Rijt LS, Logiantara A, Utsch L, Canbaz D, Boon L, and van Ree R.** House dust  
597 mite allergic airway inflammation facilitates neosensitization to inhaled allergen in mice. *Allergy*  
598 67: 1383-1391, 2012.
- 599 25. **Cyphert-Daly JM, Yang Z, Ingram JL, Tighe RM, and Que LG.** Physiologic  
600 response to chronic house dust mite exposure in mice is dependent on lot characteristics. *Journal*  
601 *of Allergy and Clinical Immunology* 144: 1428-1432.e1428, 2019.
- 602 26. **Cheng RY, Shang Y, Limjunyawong N, Dao T, Das S, Rabold R, Sham JS, Mitzner**  
603 **W, and Tang WY.** Alterations of the lung methylome in allergic airway hyper-responsiveness.  
604 *Environ Mol Mutagen* 55: 244-255, 2014.
- 605 27. **Kassabian J, Miller KD, and Lavietes MH.** Respiratory center output and ventilatory  
606 timing in patients with acute airway (asthma) and alveolar (pneumonia) disease. *Chest* 81: 536-  
607 543, 1982.
- 608 28. **Hmeidi H, Motamedi-Fakhr S, Chadwick EK, Gilchrist FJ, Lenney W, Iles R,**  
609 **Wilson RC, and Alexander J.** Tidal breathing parameters measured by structured light  
610 plethysmography in children aged 2-12 years recovering from acute asthma/wheeze compared  
611 with healthy children. *Physiol Rep* 6: e13752, 2018.
- 612 29. **Tobin MJ, Chadha TS, Jenouri G, Birch SJ, Gazeroglu HB, and Sackner MA.**  
613 Breathing patterns. 2. Diseased subjects. *Chest* 84: 286-294, 1983.
- 614 30. **Boucher M, Henry C, Khadangi F, Dufour-Mailhot A, and Bossé Y.** Double-chamber  
615 plethysmography versus oscillometry to detect baseline airflow obstruction in a model of asthma  
616 in two mouse strains. *Exp Lung Res* 47: 390-401, 2021.
- 617 31. **Crapo RO, Casaburi R, Coates AL, Enright PL, Hankinson JL, Irvin CG,**  
618 **MacIntyre NR, McKay RT, Wanger JS, Anderson SD, Cockcroft DW, Fish JE, and Sterk**  
619 **PJ.** Guidelines for methacholine and exercise challenge testing-1999. This official statement of  
620 the American Thoracic Society was adopted by the ATS Board of Directors, July 1999. *Am J*  
621 *Respir Crit Care Med* 161: 309-329, 2000.
- 622 32. **Devos FC, Maaske A, Robichaud A, Pollaris L, Seys S, Lopez CA, Verbeken E,**  
623 **Tenbusch M, Lories R, Nemery B, Hoet PHM, and Vanoirbeek JAJ.** Forced expiration

- 624 measurements in mouse models of obstructive and restrictive lung diseases. *Respiratory*  
625 *Research* 18: 123, 2017.
- 626 33. **Kelada SN.** Plethysmography Phenotype QTL in Mice Before and After Allergen  
627 Sensitization and Challenge. *G3 (Bethesda)* 6: 2857-2865, 2016.
- 628 34. **Piyadasa H, Altieri A, Basu S, Schwartz J, Halayko AJ, and Mookherjee N.**  
629 Biosignature for airway inflammation in a house dust mite-challenged murine model of allergic  
630 asthma. *Biol Open* 5: 112-121, 2016.
- 631 35. **Lofgren JL, Mazan MR, Ingenito EP, Lascola K, Seavey M, Walsh A, and Hoffman**  
632 **AM.** Restrained whole body plethysmography for measure of strain-specific and allergen-  
633 induced airway responsiveness in conscious mice. *J Appl Physiol (1985)* 101: 1495-1505, 2006.
- 634 36. **Brown RH, and Mitzner W.** The myth of maximal airway responsiveness in vivo. *J*  
635 *Appl Physiol (1985)* 85: 2012-2017, 1998.
- 636 37. **Larcombe AN, Foong RE, Bozanich EM, Berry LJ, Garratt LW, Gualano RC,**  
637 **Jones JE, Dousha LF, Zosky GR, and Sly PD.** Sexual dimorphism in lung function responses  
638 to acute influenza A infection. *Influenza Other Respir Viruses* 5: 334-342, 2011.
- 639 38. **Dubsky S, Zosky GR, Perks K, Samarage CR, Henon Y, Hooper SB, and Fouras A.**  
640 Assessment of airway response distribution and paradoxical airway dilation in mice during  
641 methacholine challenge. *J Appl Physiol (1985)* 122: 503-510, 2017.
- 642 39. **Sethi JM, Choi AM, Calhoun WJ, and Ameredes BT.** Non-invasive measurements of  
643 exhaled NO and CO associated with methacholine responses in mice. *Respir Res* 9: 45, 2008.
- 644 40. **Gueders MM, Paulissen G, Crahay C, Quesada-Calvo F, Hacha J, Van Hove C,**  
645 **Tournoy K, Louis R, Foidart JM, Noël A, and Cataldo DD.** Mouse models of asthma: a  
646 comparison between C57BL/6 and BALB/c strains regarding bronchial responsiveness,  
647 inflammation, and cytokine production. *Inflamm Res* 58: 845-854, 2009.
- 648 41. **Adler A, Cieslewicz G, and Irvin CG.** Unrestrained plethysmography is an unreliable  
649 measure of airway responsiveness in BALB/c and C57BL/6 mice. *J Appl Physiol (1985)* 97:  
650 286-292, 2004.
- 651 42. **Neuhaus-Steinmetz U, Glaab T, Daser A, Braun A, Lommatzsch M, Herz U, Kips J,**  
652 **Alarie Y, and Renz H.** Sequential development of airway hyperresponsiveness and acute airway  
653 obstruction in a mouse model of allergic inflammation. *Int Arch Allergy Immunol* 121: 57-67,  
654 2000.
- 655 43. **Milton PL, Dickinson H, Jenkin G, and Lim R.** Assessment of respiratory physiology  
656 of C57BL/6 mice following bleomycin administration using barometric plethysmography.  
657 *Respiration* 83: 253-266, 2012.
- 658 44. **Takeda K, Haczku A, Lee JJ, Irvin CG, and Gelfand EW.** Strain dependence of  
659 airway hyperresponsiveness reflects differences in eosinophil localization in the lung. *Am J*  
660 *Physiol Lung Cell Mol Physiol* 281: L394-402, 2001.
- 661 45. **Parameswaran K, Todd DC, and Soth M.** Altered respiratory physiology in obesity.  
662 *Can Respir J* 13: 203-210, 2006.
- 663 46. **Jacono FJ.** Control of ventilation in COPD and lung injury. *Respir Physiol Neurobiol*  
664 189: 371-376, 2013.
- 665 47. **Tobin MJ, Yang K, and Upson D.** Breathing pattern in asthma. *Chest* 95: 1-2, 1989.
- 666 48. **Bourke SC, and Gibson GJ.** Sleep and breathing in neuromuscular disease. *Eur Respir J*  
667 19: 1194-1201, 2002.
- 668 49. **Shore SA.** Obesity and asthma: lessons from animal models. *J Appl Physiol (1985)* 102:  
669 516-528, 2007.

## Leak-Free Head-Out Plethysmography System

- 670 50. **Kline DD, Yang T, Huang PL, and Prabhakar NR.** Altered respiratory responses to  
671 hypoxia in mutant mice deficient in neuronal nitric oxide synthase. *The Journal of physiology*  
672 511 ( Pt 1): 273-287, 1998.
- 673 51. **Bloom AJ.** Mouse strain-specific acute respiratory effects of nicotine unrelated to  
674 nicotine metabolism. *Toxicol Mech Methods* 29: 542-548, 2019.
- 675 52. **Fairchild GA.** Measurement of respiratory volume for virus retention studies in mice.  
676 *Appl Microbiol* 24: 812-818, 1972.
- 677 53. **Quindry JC, Ballmann CG, Epstein EE, and Selsby JT.** Plethysmography  
678 measurements of respiratory function in conscious unrestrained mice. *J Physiol Sci* 66: 157-164,  
679 2016.
- 680 54. **Lim R, Zavou MJ, Milton PL, Chan ST, Tan JL, Dickinson H, Murphy SV, Jenkin**  
681 **G, and Wallace EM.** Measuring respiratory function in mice using unrestrained whole-body  
682 plethysmography. *J Vis Exp* e51755, 2014.
- 683 55. **Irvin CG, and Bates JH.** Measuring the lung function in the mouse: the challenge of  
684 size. *Respir Res* 4: 4, 2003.
- 685 56. **Kemény Á, Csekő K, Szitter I, Varga ZV, Bencsik P, Kiss K, Halmosi R, Deres L,**  
686 **Erős K, Perkecz A, Kereskai L, László T, Kiss T, Ferdinandy P, and Helyes Z.** Integrative  
687 characterization of chronic cigarette smoke-induced cardiopulmonary comorbidities in a mouse  
688 model. *Environ Pollut* 229: 746-759, 2017.



## Leak-Free Head-Out Plethysmography System

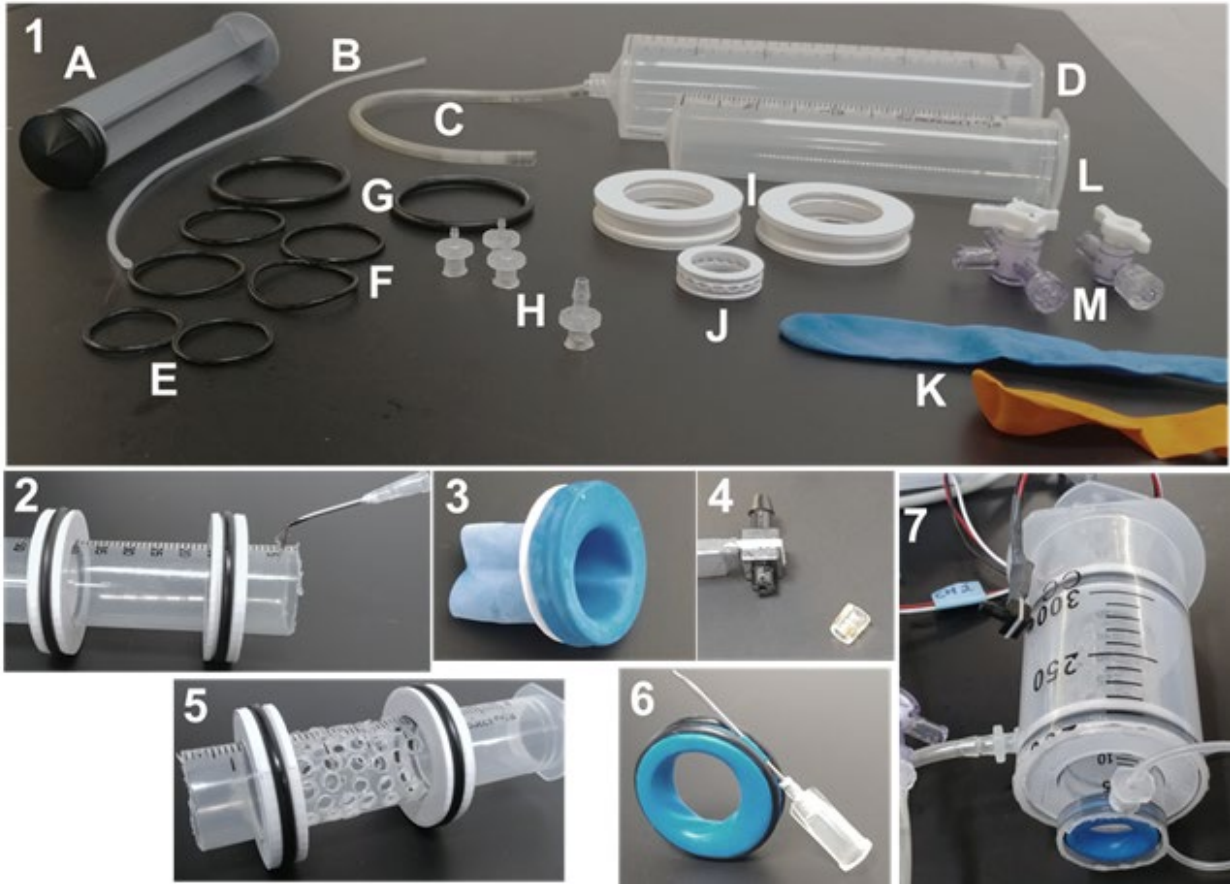

689

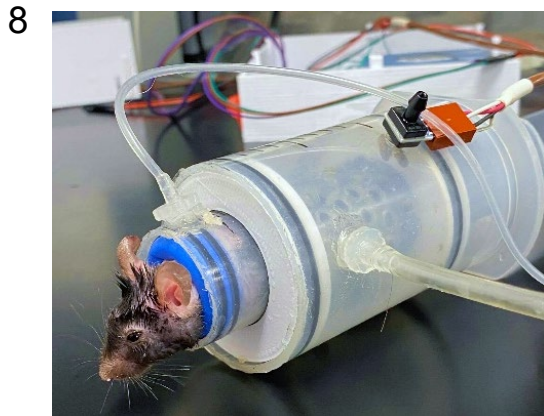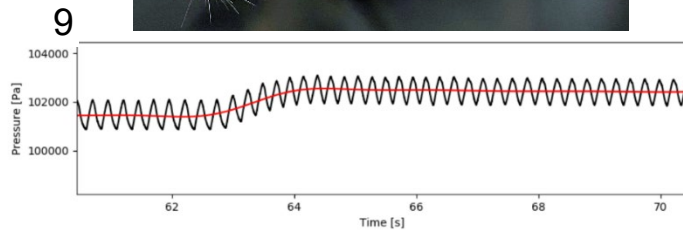

## 10 Sample Linear Regression Lines

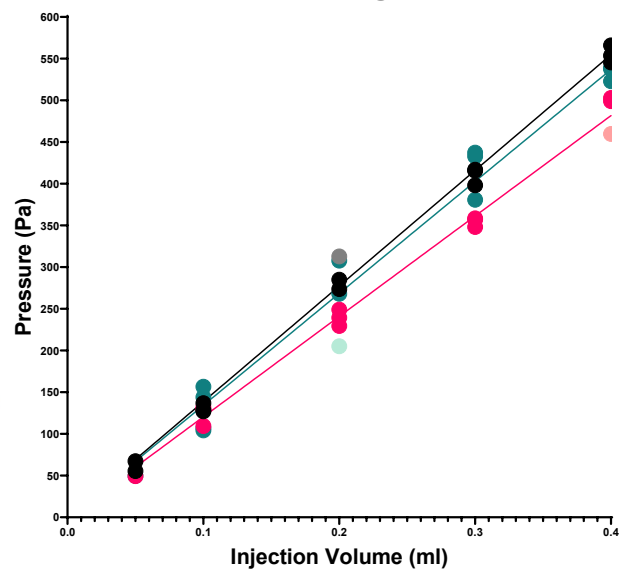

## Leak-Free Head-Out Plethysmography System

**Figure 1.** Construction of a leak proof, variable-pressure head-out plethysmography chamber that can be calibrated. 1) Head-out plethysmography chamber materials. A. Plunger fitting in 60 ml syringe (L) to prevent mouse from backing out of chamber B. Tubing to create balloon cuff air port C. Tubing to create calibration air port D. 300 ml outer syringe E. Two O-rings to secure balloon to 3-D printed ring for balloon cuff (J) F. Four inner O-rings to secure 3D printed spacer (into I) G. Two outer O-rings to secure 3D printed spacer (into I) H. Female luers to create air port and attach tubing to stopcocks (M) I. Two 3D printed spacers J. 3D printed ring for balloon cuff K. Two options for balloons to create balloon cuff L. Inner chamber 60 ml syringe M. Stopcocks to allow air flow into balloon cuff and out chamber 2) Inner chamber with 3D printed spacers and O-rings fitted into grooves, picturing creation of hole for balloon port 3) Preparation of balloon cuff to be placed directly under hole (created in 2) 4) Pressure transducer with tip removed from one end and small piece of plastic tubing to place over the tip 5) Inner chamber complete with holes for adequate assessment of pressure changes by pressure transducer 6) Sample of how to perforate balloon cuff to allow inflation 7) Complete set-up with inner and outer chamber, balloon cuff, pressure transducer, and ports to allow for airflow into the chamber or into the balloon 8) mouse in plethysmography chamber 9) Sample pressure trace with breaths signified in black and the red line indicating average pressure which shifts after injection of a calibrating quantity of air at 63 seconds. 10) Sample of calibration regression lines created for 3 mice (pink, marine, and black) with automatically excluded points in corresponding lighter color.

690

691

692

693

## Leak-Free Head-Out Plethysmography System

694

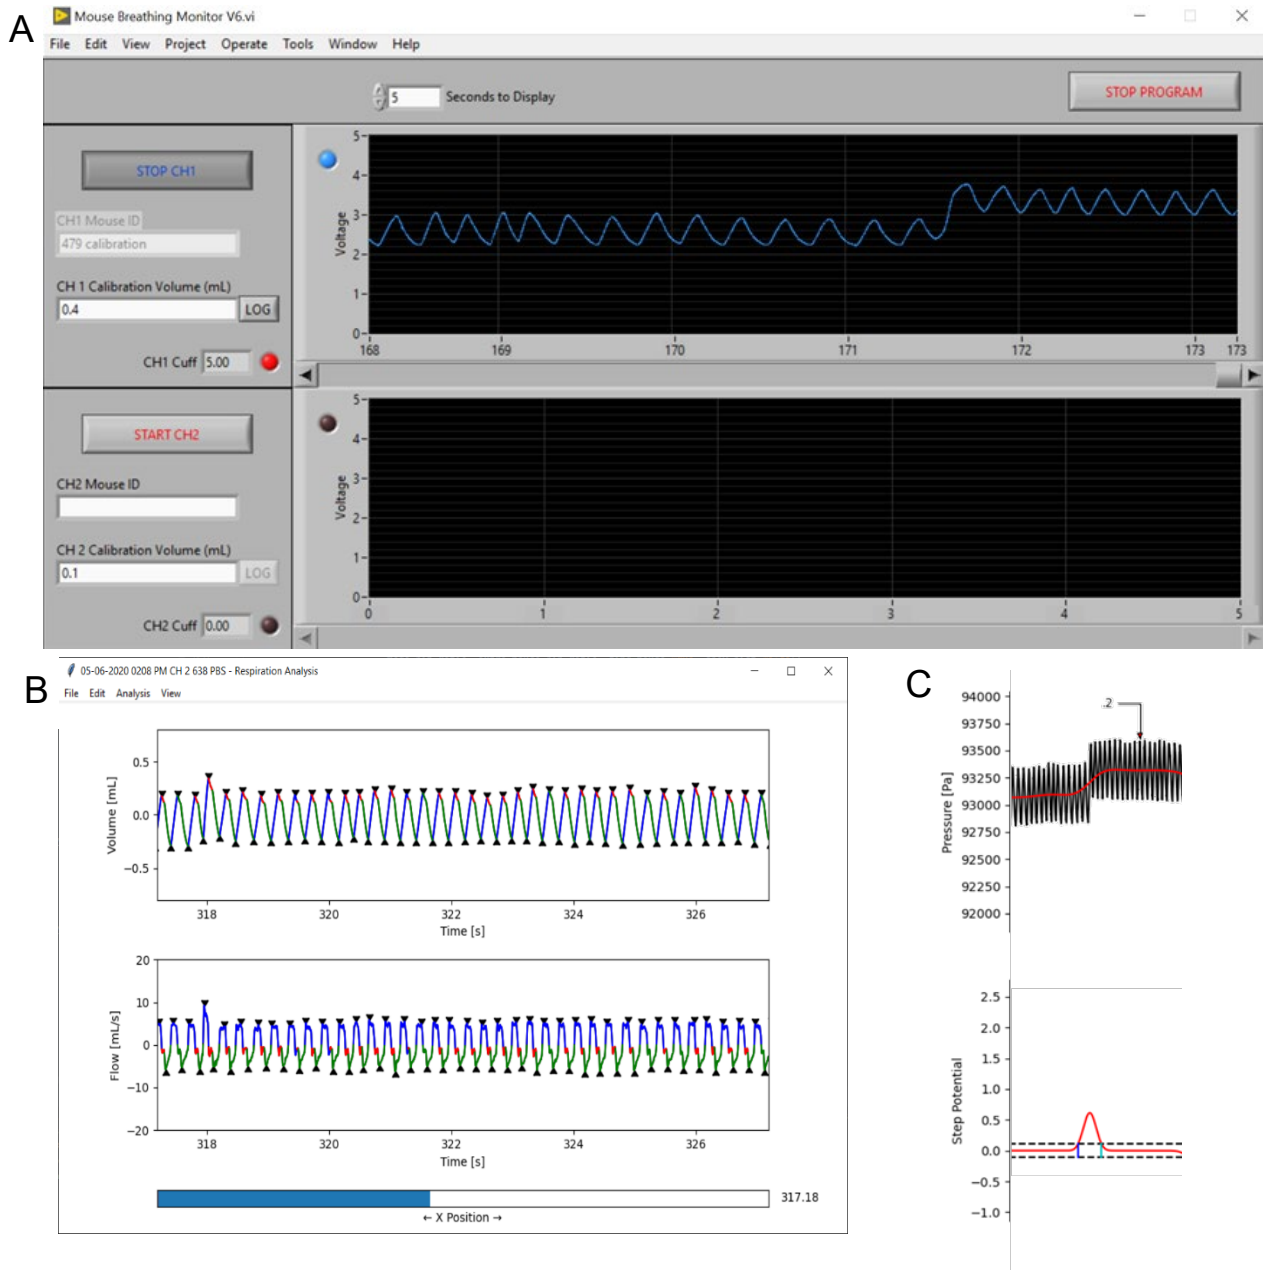

**Figure 2.** User interface for data collection and analysis software. A) Representative user interface for breathing data collection program. White boxes represent area where user can fill in data for mice from two separate chambers. B) Sample breathing trace opened with Python Respiratory Analysis Software with pressure converted to volume and flow and identified breath landmarks. Blue=inspiration, red=end-inspiratory pause, green=exhalation. C) Mouse breathing pressure signal during a 0.2ml calibration injection. Calibration injection signal, red, obtained after smoothing the pressure signal with a Gaussian filter (sigma=400 datapoints; top). Step potential,  $\theta_i$ , red, for the region of interest surrounding the calibration injection (bottom). Positive and negative step height thresholds, dotted black, set at 0.25 standard deviations from  $\theta_i = 0$ . Data points in peaks exceeding the step height thresholds represent step regions in the breathing signal. Data points within the step height thresholds represent plateau regions.



## Leak-Free Head-Out Plethysmography System

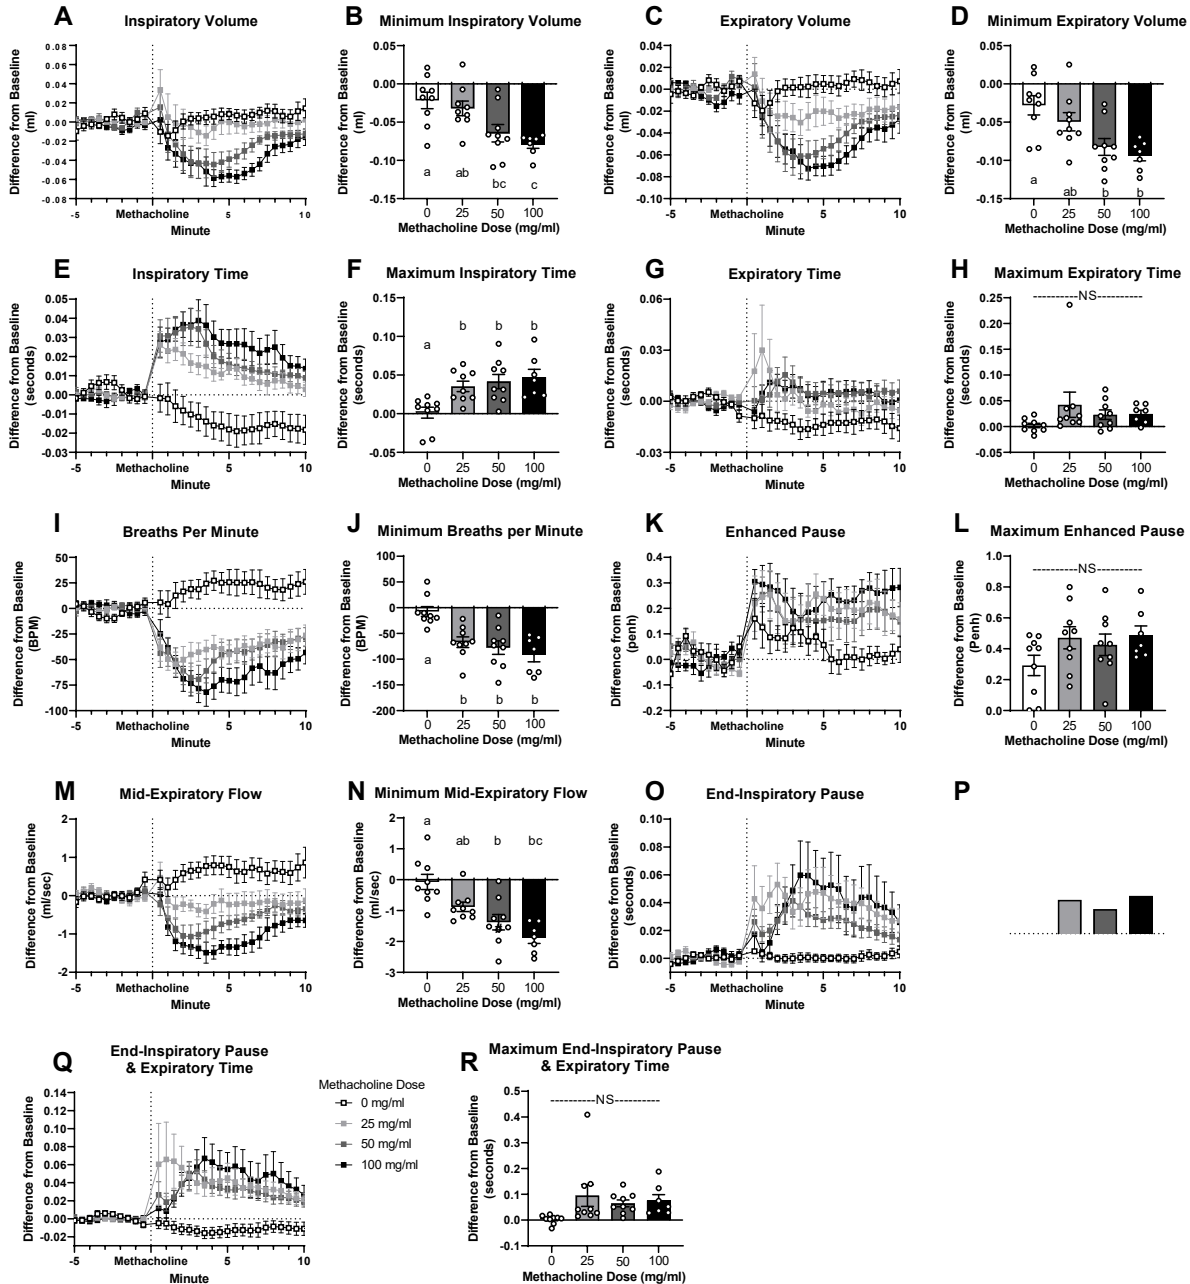

695

696

**Figure 3.** Response to aerosolized methacholine given at minute 0 (exposure 30 seconds; flow rate 0.191 ml/30 sec.). Figures A, C, E, G, I, K, M, O & Q report time course. Results presented as difference from a baseline measurement taken before methacholine exposure. Figures B, D, F, H, J, L, N, P & R report minimum/maximum 1 minute rolling average occurring within 10 minutes after methacholine administration. Data are presented as mean  $\pm$  SEM. <sup>a,b,c</sup> bars that do not share a letter differ significantly ( $P < 0.05$ ;  $n = 7-9$ ).

697

## Leak-Free Head-Out Plethysmography System

698

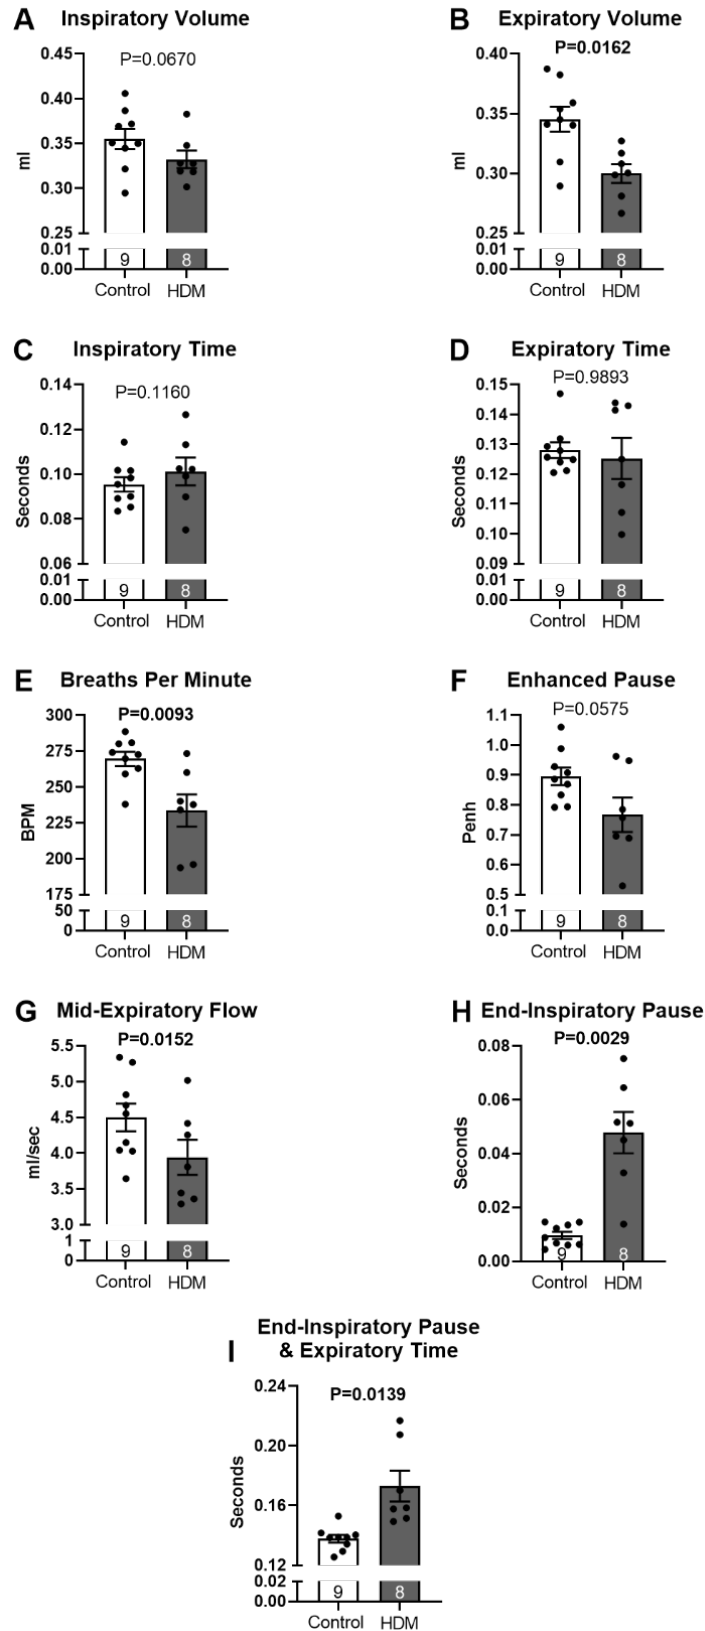

**Figure 4.** Tidal breathing in mice before (white) and after (gray) sensitization with house dust mite. Data are presented as mean  $\pm$  SEM (n = 8-9).

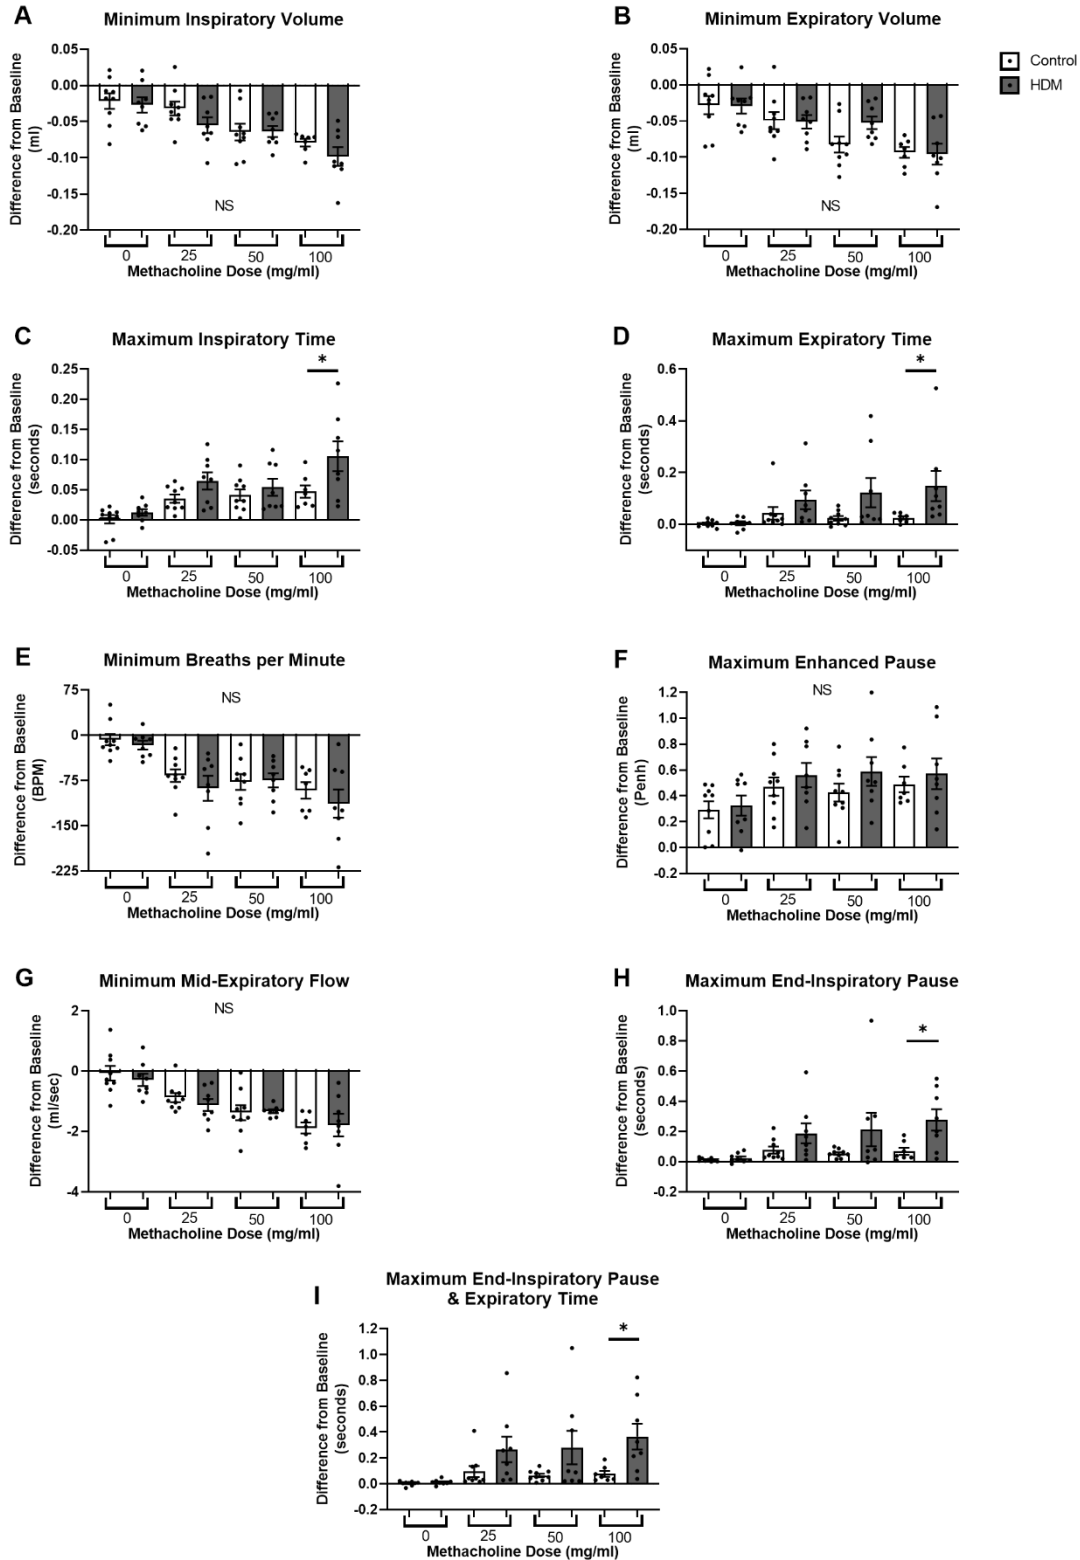

**Figure 5.** Minimal or maximal 1 minute rolling average over the 10 minutes after expose to methacholine (0, 25, 50, or 100 mg/ml exposure for 30 seconds nebulized at flow rate of 0.191 ml/30 sec) before and after sensitization with house dust mite. \*Indicates significant differences ( $P < 0.05$ ) before (white) and after (gray) house dust mite exposure. Data are presented as mean  $\pm$  SEM ( $n = 8-9$ ).

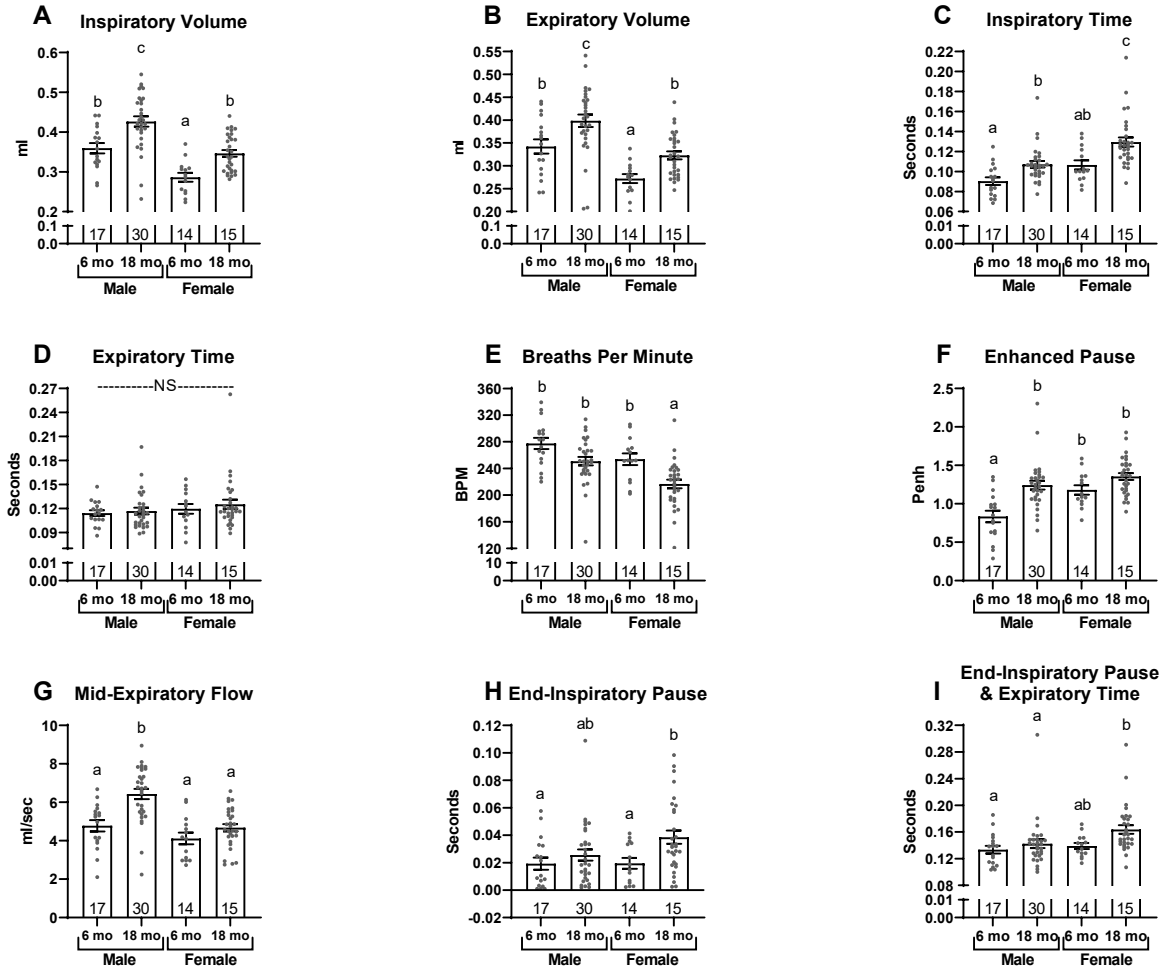

**Figure 6.** Tidal breathing in male and female mice aged 6 months (mo.) and 18 mo. Data are presented as mean  $\pm$  SEM. <sup>a,b,c</sup> bars that do not share a common letter differ significantly ( $P < 0.05$ ;  $n = 14-30$ ).

**Table 1.** Landmarks and Descriptive Variables Identified for Each Breath

| Landmarks                          |                                                                                                                                                                                      |
|------------------------------------|--------------------------------------------------------------------------------------------------------------------------------------------------------------------------------------|
| Landmark                           | Description                                                                                                                                                                          |
| Inhale Onset                       | Start of inhale phase                                                                                                                                                                |
| Inhale Offset                      | End of inhale phase                                                                                                                                                                  |
| Post-Inhale Pause Onset            | Start of pause phase occurring after inhale phase                                                                                                                                    |
| Post-Inhale Pause Offset           | End of pause phase occurring after inhale phase                                                                                                                                      |
| Exhale Onset                       | Start of exhale phase                                                                                                                                                                |
| Exhale Offset                      | End of exhale phase                                                                                                                                                                  |
| Post-Exhale Pause Onset            | Start of pause phase occurring after exhale phase                                                                                                                                    |
| Post-Exhale Pause Offset           | End of pause phase occurring after exhale phase                                                                                                                                      |
| Inhale Flow Peak                   | Point of maximum flow during inhale and post-inhale pause phases                                                                                                                     |
| Exhale Flow Peak                   | Point of maximum flow during exhale and post-exhale pause phases                                                                                                                     |
| Inhale Volume Peak                 | Point of maximum volume during inhale and post-inhale pause phases                                                                                                                   |
| Exhale Volume Peak                 | Point of maximum volume during exhale and post-exhale pause phases                                                                                                                   |
| 50% Exhale Volume                  | Point where 50% of maximum volume during exhale phase is achieved                                                                                                                    |
| 64% Exhale Volume                  | Point where 64% of maximum volume during exhale phase is achieved                                                                                                                    |
| Descriptive Variables              |                                                                                                                                                                                      |
| Breath Measurement                 | Description                                                                                                                                                                          |
| Inspiratory Volume                 | Volume change from inhalation onset to inhalation offset                                                                                                                             |
| Post-Inhalation Pause Volume       | Volume change from post-inhalation pause onset to post-inhalation pause offset                                                                                                       |
| Expiratory Volume                  | Volume change from exhalation onset to exhalation offset                                                                                                                             |
| Post-Exhalation Pause Volume       | Volume change from post-exhalation pause onset to post-exhalation pause offset                                                                                                       |
| Inhalation Peak Flow               | Flow value at inhalation flow peak                                                                                                                                                   |
| Exhalation Peak Flow               | Flow value at exhalation flow peak                                                                                                                                                   |
| Mid-Expiratory flow (EF50)         | Flow value at 50% expiratory volume                                                                                                                                                  |
| Inspiratory Time                   | Time change from inhalation onset to inhalation offset                                                                                                                               |
| End-Inspiratory pause              | Time change from post-inhalation pause onset to post-inhalation pause offset                                                                                                         |
| Expiratory Time                    | Time change from exhalation onset to exhalation offset                                                                                                                               |
| Breath Duration                    | Time change from inhalation onset to post-exhalation pause offset                                                                                                                    |
| Estimated Breaths per Minute (BPM) | Estimated number of breaths per minute based on current breath's duration                                                                                                            |
| Exhalation 64% Relaxation Time     | Time change from exhalation onset to 64% exhale volume                                                                                                                               |
| Enhanced Pause (Penh)              | $\left( \frac{\text{Exhalation Duration}}{\text{Exhalation 64\% Relaxation Time}} - 1 \right) \times \left( \frac{\text{Exhalation Peak Flow}}{\text{Inhalation Peak Flow}} \right)$ |

## Leak-Free Head-Out Plethysmography System

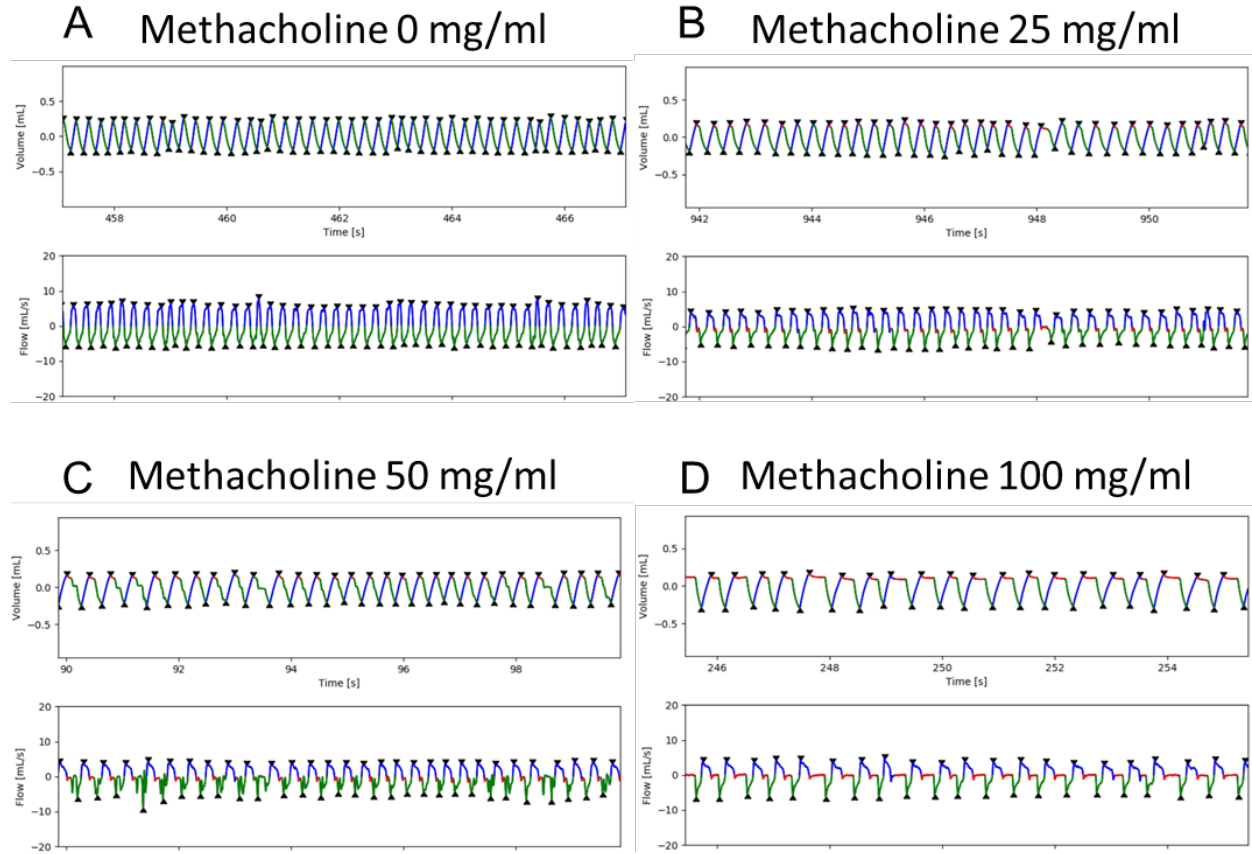

**Supplementary Figure 1.** Representative sample of breathing trace after exposure to bronchoconstrictor A) 0 B) 25 C) 50 D) 100 mg/ml of methacholine for 30 seconds at flow rate of 0.191 ml/30 sec. Blue = inspiration, green = expiration, red = end-inspiratory pause.

## Leak-Free Head-Out Plethysmography System

**Supplementary Table 1.** Repeated calibrations in the same mouse to calculate variability within and across mice and residual difference between calculated and actual change in volume during calibrations to identify the sensitivity of measurement.

| Mouse | Mouse Weight (g) | Session Number | Regression Equation | R <sup>2</sup> Value | Average Residual Value (μl) | SEM    |
|-------|------------------|----------------|---------------------|----------------------|-----------------------------|--------|
| 1     | 23.4             | 1              | y=1318.43x          | 0.99                 | 25.27                       | 0.0014 |
| 1     |                  | 2              | y=1207.74x          | 0.93                 | 14.59                       | 0.0009 |
| 1     |                  | 3              | y=1272.37x          | 0.95                 | 13.55                       | 0.0008 |
| 1     |                  | 4              | y=1338.53x          | 0.99                 | 14.42                       | 0.0009 |
| 2     | 21.5             | 1              | y=1179.82x          | 0.99                 | 12.98                       | 0.0009 |
| 2     |                  | 2              | y=1319.87x          | 0.99                 | 21.55                       | 0.0018 |
| 2     |                  | 3              | y=1314.65x          | 0.99                 | 22.36                       | 0.0024 |
| 2     |                  | 4              | y=1411.60x          | 0.99                 | 9.29                        | 0.0009 |
| 3     | 22.6             | 1              | y=1200.79x          | 0.98                 | 9.29                        | 0.0007 |
| 3     |                  | 2              | y=1361.35x          | 1.00                 | 11.05                       | 0.0006 |
| 3     |                  | 3              | y=1325.56x          | 0.99                 | 8.24                        | 0.0005 |
| 3     |                  | 4              | y=1206.01x          | 0.99                 | 12.08                       | 0.0008 |
| 4     | 22.3             | 1              | y=1378.43x          | 1.00                 | 10.82                       | 0.0012 |
| 4     |                  | 2              | y=1199.40x          | 0.95                 | 4.73                        | 0.0004 |
| 4     |                  | 3              | y=1180.05x          | 0.95                 | 10.78                       | 0.0010 |
| 4     |                  | 4              | y=1262.16x          | 0.99                 | 10.41                       | 0.0007 |
| 5     | 20.2             | 1              | y=1131.72x          | 0.99                 | 5.09                        | 0.0003 |
| 5     |                  | 2              | y=1245.60x          | 0.99                 | 22.01                       | 0.0015 |
| 5     |                  | 3              | y=1153.74x          | 0.98                 | 12.04                       | 0.0008 |
| 5     |                  | 4              | y=1248.37x          | 0.97                 | 8.04                        | 0.0006 |
| 6     | 19.8             | 1              | y=1223.48x          | 0.98                 | 12.32                       | 0.0010 |
| 6     |                  | 2              | y=1314.37x          | 0.98                 | 10.98                       | 0.0006 |
| 6     |                  | 3              | y=1356.95x          | 0.98                 | 10.37                       | 0.0008 |
| 6     |                  | 4              | y=1230.22x          | 0.98                 | 15.38                       | 0.0010 |
| 7     | 21.5             | 1              | y=1140.25x          | 0.99                 | 14.24                       | 0.0007 |
| 7     |                  | 2              | y=1356.88x          | 0.98                 | 14.09                       | 0.0006 |
| 7     |                  | 3              | y=1223.15x          | 1.00                 | 14.65                       | 0.0006 |
| 7     |                  | 4              | y=1303.98x          | 0.97                 | 14.55                       | 0.0009 |
| 8     | 17.7             | 1              | y=1162.83x          | 0.97                 | 9.79                        | 0.0009 |
| 8     |                  | 2              | y=1266.71x          | 1.00                 | 13.05                       | 0.0012 |
| 8     |                  | 3              | y=1204.77x          | 0.99                 | 6.55                        | 0.0004 |
| 8     |                  | 4              | y=1243.15x          | 1.00                 | 18.41                       | 0.0010 |
| 9     | 18.2             | 1              | y=1278.32x          | 0.96                 | 13.37                       | 0.0010 |
| 9     |                  | 2              | y=1242.87x          | 0.98                 | 6.81                        | 0.0005 |
| 9     |                  | 3              | y=1252.19x          | 0.99                 | 7.66                        | 0.0004 |
| 9     |                  | 4              | y=1283.92x          | 0.98                 | 5.48                        | 0.0003 |

## Leak-Free Head-Out Plethysmography System

**Supplementary Table 2.** Tidal Breathing Validation

| <b>Variable</b>             | <b>Reported Value Ranges</b>  | <b>Measured Value<br/>(Mean <math>\pm</math> SEM)</b> |
|-----------------------------|-------------------------------|-------------------------------------------------------|
| Inspiratory Volume (ml)     |                               | 0.36 $\pm$ 0.011                                      |
| Expiratory Volume (ml)      |                               | 0.35 $\pm$ 0.010                                      |
| Tidal Volume (ml)           | 0.2-22 (51, 52)               |                                                       |
| Inspiratory Time (sec)      | 0.05-0.1 (35, 43, 51, 53, 54) | 0.10 $\pm$ 0.003                                      |
| Expiratory Time (sec)       | 0.1-0.14 (35, 43, 53, 54)     | 0.13 $\pm$ 0.003                                      |
| Breaths Per Minute          | 250-350 (18, 43, 51, 52, 55)  | 270 $\pm$ 5.00                                        |
| Penh                        | 0.7- 1 (39, 41)               | 0.89 $\pm$ 0.027                                      |
| Mid-Expiratory Flow (ml/s)  | 2 ml/s (BALB/C) (18, 56)      | 4.50 $\pm$ 0.200                                      |
| End-Inspiratory Pause (sec) | 0.015-0.02 (18)               | 0.01 $\pm$ 0.001                                      |



**Supplementary Table 3.** Comparison of Methacholine Response Between Studies (Whole-Body Plethysmography)

| Post Methacholine 5 Minute Average Percent Change from Baseline                       |                    |                        |                    |           |                    |                        |              |
|---------------------------------------------------------------------------------------|--------------------|------------------------|--------------------|-----------|--------------------|------------------------|--------------|
| Variable                                                                              | Percent Change (%) | Methacholine Dose (mg) | Mouse & Sex        | Reference | Percent Change (%) | Methacholine Dose (mg) | Mouse & Sex  |
| Tidal Volume                                                                          | 6.04               | 19.1                   | Unspecified        | (10)      | -12.56             | 19.1                   | Male C57BL/6 |
|                                                                                       | -5.17              | 4700                   | Female C57BL/6     | (35)      |                    |                        |              |
| Inspiratory Time                                                                      | 1.85               | 19.1                   | Unspecified        | (10)      | 37.52              |                        |              |
| Expiratory Time                                                                       | 12.79              | 19.1                   | Unspecified        | (10)      | 4.54               |                        |              |
| Breaths Per Minute                                                                    | -7.07              | 19.1                   | Unspecified        | (10)      | -22.17             |                        |              |
|                                                                                       | -11.59             | 4700                   | Female C57BL/6     | (35)      |                    |                        |              |
| Penh                                                                                  | -3.21              | 19.1                   | Unspecified        | (10)      | 28.79              |                        |              |
| Post Methacholine 2 Minute Average Percent Change from Baseline                       |                    |                        |                    |           |                    |                        |              |
| Expiratory Time                                                                       | 50                 | 5700                   | Female C57BL/6     | (27)      | 4.54               | 19.1                   | Male C57BL/6 |
| Penh                                                                                  | 0                  | 5700                   | Female C57BL/6     | (27)      | 28.79              |                        |              |
| Post Methacholine Minimum/Maximum Value within 3 Minutes Percent Change from Baseline |                    |                        |                    |           |                    |                        |              |
| Penh                                                                                  | 8.33               | 6                      | Male C57BL/6       | (37)      | 31.78              | 19.1                   | Male C57BL/6 |
| EF50                                                                                  | -1.67              | 0.239                  | Unspecified Balb/c | (18)      | -15.63             |                        |              |
| White = Values Reported in Other Studies; Gray = Author's Reported Values             |                    |                        |                    |           |                    |                        |              |
